# Supplementary material for: Community social support and onset of dementia in older Japanese individuals: a multilevel analysis using the JAGES cohort data
Source: PubMed Central journal article supplement — BMJ Open. 2021 Jun 3;11(6):e044631. doi: 10.1136/bmjopen-2020-044631 (PMC8183266; doi:10.1136/bmjopen-2020-044631), 2021-06-03
Supplement: bmjopen-2020-044631.draft_revisions.pdf [file bmjopen-2020-044631.draft_revisions.pdf]

# BMJ Open

BMJ Open is committed to open peer review. As part of this commitment we make the peer review history of every article we publish publicly available.

When an article is published we post the peer reviewers' comments and the authors' responses online. We also post the versions of the paper that were used during peer review. These are the versions that the peer review comments apply to.

The versions of the paper that follow are the versions that were submitted during the peer review process. They are not the versions of record or the final published versions. They should not be cited or distributed as the published version of this manuscript.

BMJ Open is an open access journal and the full, final, typeset and author-corrected version of record of the manuscript is available on our site with no access controls, subscription charges or pay-per-view fees (<http://bmjopen.bmj.com>).

If you have any questions on BMJ Open's open peer review process please email [info.bmjopen@bmj.com](mailto:info.bmjopen@bmj.com)

# BMJ Open

## Community social support and onset of dementia in older Japanese individuals: A multilevel analysis using the JAGES cohort data

|                               |                                                                                                                                                                                                                                                                                                                                                                                                                                                                                                                                                                                                                                                                                                                                                                                                                                                                                    |
|-------------------------------|------------------------------------------------------------------------------------------------------------------------------------------------------------------------------------------------------------------------------------------------------------------------------------------------------------------------------------------------------------------------------------------------------------------------------------------------------------------------------------------------------------------------------------------------------------------------------------------------------------------------------------------------------------------------------------------------------------------------------------------------------------------------------------------------------------------------------------------------------------------------------------|
| Journal:                      | <i>BMJ Open</i>                                                                                                                                                                                                                                                                                                                                                                                                                                                                                                                                                                                                                                                                                                                                                                                                                                                                    |
| Manuscript ID                 | bmjopen-2020-044631                                                                                                                                                                                                                                                                                                                                                                                                                                                                                                                                                                                                                                                                                                                                                                                                                                                                |
| Article Type:                 | Original research                                                                                                                                                                                                                                                                                                                                                                                                                                                                                                                                                                                                                                                                                                                                                                                                                                                                  |
| Date Submitted by the Author: | 08-Sep-2020                                                                                                                                                                                                                                                                                                                                                                                                                                                                                                                                                                                                                                                                                                                                                                                                                                                                        |
| Complete List of Authors:     | <p>Miyaguni, Yasuhiro; National Center for Geriatrics and Gerontology, Department of Gerontological Evaluation, Center for Gerontology and Social Science</p> <p>Tabuchi, Takahiro; Osaka International Cancer Institute, Cancer Control Center</p> <p>Aida, Jun; Tohoku University Graduate School of Dentistry, Department of International and Community Oral Health</p> <p>Saito, Masashige; Nihon Fukushi University, Department of Social Welfare</p> <p>Tsuji, Taishi; University of Tsukuba, Faculty of Health and Sport Sciences</p> <p>Sasaki, Yuri; National Institute of Public Health, Department of International Health and Collaboration</p> <p>Kondo, Katsunori; National Center for Geriatrics and Gerontology, Department of Gerontological Evaluation, Center for Gerontology and Social Science; Chiba University, Center for Preventive Medical Sciences</p> |
| Keywords:                     | Dementia < NEUROLOGY, EPIDEMIOLOGY, SOCIAL MEDICINE                                                                                                                                                                                                                                                                                                                                                                                                                                                                                                                                                                                                                                                                                                                                                                                                                                |
|                               |                                                                                                                                                                                                                                                                                                                                                                                                                                                                                                                                                                                                                                                                                                                                                                                                                                                                                    |

SCHOLARONE™  
Manuscripts

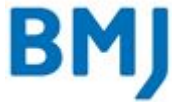

I, the Submitting Author has the right to grant and does grant on behalf of all authors of the Work (as defined in the below author licence), an exclusive licence and/or a non-exclusive licence for contributions from authors who are: i) UK Crown employees; ii) where BMJ has agreed a CC-BY licence shall apply, and/or iii) in accordance with the terms applicable for US Federal Government officers or employees acting as part of their official duties; on a worldwide, perpetual, irrevocable, royalty-free basis to BMJ Publishing Group Ltd ("BMJ") its licensees and where the relevant Journal is co-owned by BMJ to the co-owners of the Journal, to publish the Work in this journal and any other BMJ products and to exploit all rights, as set out in our [licence](#).

The Submitting Author accepts and understands that any supply made under these terms is made by BMJ to the Submitting Author unless you are acting as an employee on behalf of your employer or a postgraduate student of an affiliated institution which is paying any applicable article publishing charge ("APC") for Open Access articles. Where the Submitting Author wishes to make the Work available on an Open Access basis (and intends to pay the relevant APC), the terms of reuse of such Open Access shall be governed by a Creative Commons licence – details of these licences and which [Creative Commons](#) licence will apply to this Work are set out in our licence referred to above.

Other than as permitted in any relevant BMJ Author's Self Archiving Policies, I confirm this Work has not been accepted for publication elsewhere, is not being considered for publication elsewhere and does not duplicate material already published. I confirm all authors consent to publication of this Work and authorise the granting of this licence.

1  
2  
3 **Community social support and onset of dementia in older Japanese individuals: A**  
4 **multilevel analysis using the JAGES cohort data**  
5  
6  
7  
8  
9

10 Yasuhiro Miyaguni<sup>1\*</sup>, Takahiro Tabuchi<sup>2</sup>, Jun Aida<sup>3</sup>, Masashige Saito<sup>4</sup>, Taishi Tsuji<sup>5</sup>, Yuri  
11 Sasaki<sup>6</sup>, Katsunori Kondo<sup>1,7</sup>  
12  
13  
14

15  
16  
17 <sup>1</sup>Department of Gerontological Evaluation, Center for Gerontology and Social Science,  
18 National Center for Geriatrics and Gerontology, Aichi, Japan

19  
20  
21 <sup>2</sup>Cancer Control Center, Osaka International Cancer Institute, Osaka, Japan

22  
23  
24 <sup>3</sup>Department of International and Community Oral Health, Tohoku University Graduate  
25 School of Dentistry, Miyagi, Japan

26  
27  
28 <sup>4</sup>Department of Social Welfare, Nihon Fukushi University, Aichi, Japan

29  
30  
31 <sup>5</sup>Faculty of Health and Sport Sciences, University of Tsukuba, Tokyo, Japan

32  
33  
34 <sup>6</sup>Department of International Health and Collaboration, National Institute of Public Health,  
35 Saitama, Japan

36  
37  
38 <sup>7</sup>Center for Preventive Medical Sciences, Chiba University, Chiba, Japan  
39  
40  
41

42 **\*Correspondence to:** Yasuhiro Miyaguni, PhD

43  
44 Department of Gerontological Evaluation, Center for Gerontology and Social Science,  
45 National Center for Geriatrics and Gerontology, Aichi 474-8511, Japan

46  
47  
48 Tel: +81-562-46-2311

49  
50  
51 Email: yasuhiro@miyaguni.net  
52  
53  
54

55  
56 **Word count:** 2916 words  
57  
58  
59  
60

## ABSTRACT

**Objective:** Recently, there has been an increase in the number of people with dementia.

However, no study has examined the association between community-level social support and the onset of incident dementia using multilevel survival analysis.

**Design:** A prospective cohort study.

**Participants and setting:** We analyzed data pertaining to 15,313 community-dwelling adults aged 65 years or older (7,381 men, 7,932 women) who had not accessed long-term care insurance and were living in Aichi Prefecture (seven municipalities) in Japan.

**Primary and secondary outcome measures:** The association between community-level social support and onset of incident dementia was examined using the Japan Gerontological Evaluation Study, a prospective cohort study introduced in Japan in 2003. Incident dementia was assessed using Long-term Care Insurance records spanning 3,436 days from the baseline survey.

**Results:** During the 10-year follow-up, the onset of incident dementia occurred in 1,776 adults. Among older people, a 1% increase in community-level social support (in the form of receiving emotional support) was associated with an approximately 4% reduction in the risk of developing dementia, regardless of socio-demographic variables and health conditions (HR = 0.96; 95% CI = 0.94-0.99).

**Conclusions:** Receiving community-level social support in the form of emotional support is associated with a lower risk of developing incident dementia.

**Keywords:** Cognitive decline, Population health, Social epidemiology

### STRENGTHS AND LIMITATIONS OF THIS STUDY

- To date, no study has examined the association between community-level social support and the onset of incident dementia using multilevel survival analysis.
- This is a long-term follow-up study that followed older adults in Japan for about 10 years.
- The sample does not fully reflect the older population in Japan because the study subjects were recruited from a single prefecture.

## INTRODUCTION

Dementia constitutes a pressing health challenge, especially among the older population. The incidence of dementia worldwide is projected to rise to 66 and 131 million by 2030 and 2050, respectively.[1] In Japan alone, it is predicted that there will be 4.62 and 7 million people affected by 2012 and 2025, respectively. These rates suggest that about one in seven Japanese people aged 65 years or above may develop dementia.[2]

Currently, no effective therapeutic intervention for dementia has been determined. As such, identifying adjustable risks and preventive measures is essential for slowing down or preventing the onset of dementia.[3] Previous studies have identified genetic, vascular, and lifestyle-related factors,[4-9] such as advanced age, being female, having a low education level, being in poor health, smoking, and heavy drinking, as being associated with a higher risk of developing dementia. An additional significantly adjustable risk factor is the lack of positive social networks and influences. A previous study suggested that engagement in social activities, and having a rich network of activities within close relationships, confers some protection against dementia among older people.[4]

The definition and the attendant use of the notion of social relationships vary among researchers. The concept may encompass factors such as social participation, social networks, and social support. Social support might also be a significant protective factor for cognitive aging.[10] Social support has been categorized into four types: giving and receiving support at an emotional level, as well as giving and receiving support at an instrumental level.[11] These types of support occur at an individual level and have been associated with improved health. For example, providing emotional and instrumental social support to non-family members leads to fewer depressive symptoms.[12] Providing emotional support to relatives, friends, and neighbors, along with instrumental support to spouses, further lowers the risk of mortality.[13] Receiving emotional support is associated with improved cognitive

1  
2  
3 function.[10] However, incident dementia has been reported in instances where social support  
4  
5 is extended between co-resident members of the family.[13]  
6  
7

8 Besides individual-level social factors, social networks, and relationships at the  
9  
10 community level have been investigated to understand its association with moderating the  
11  
12 risk of functional disability. Such studies investigate “social capital,” that has been defined as  
13  
14 the “resources that are accessed by individuals as a result of their membership of a network or  
15  
16 a group.”[14] A previous study found that lower social capital at the community-level is  
17  
18 associated with an increased rate of functional disability among older women.[11] And there  
19  
20 are reports of research on community social capital and cognitive decline.[15] However,  
21  
22 because these studies are cross-sectional studies, they do not take into account temporal  
23  
24 pre/posterior relationships. Nevertheless, no studies have examined how community-level  
25  
26 social support influences the risk of dementia. Therefore, this study seeks to evaluate the  
27  
28 relationship between social support at the community level and the onset of dementia.  
29  
30  
31  
32  
33  
34

## 35 **METHODS**

### 36 **Sample**

37  
38 Data for this study were accessed via the Japan Gerontological Evaluation Study (JAGES).  
39  
40 Set up in Aichi in 2003, this is a prospective cohort study of the Center for Well-being and  
41  
42 Society of the Nihon Fukushi University.[16] The research was carried out in seven  
43  
44 municipalities encompassing the entire southern region of the Chita peninsula and the Aichi  
45  
46 Prefecture. In October 2003, an estimated 276,208 people resided in these locations. Of this  
47  
48 population, 18.0% were aged 65 years or above.[14] On average, the data of 6,300 residents  
49  
50 in the 44 school districts were analyzed in this study. Care was taken to limit the sample to  
51  
52 people aged 65 years and above who were not recipients of long-term public health insurance  
53  
54 benefits due to physical or mental challenges. A random selection of 33,152 people aged 65  
55  
56  
57  
58  
59  
60



1  
2  
3 years or older was performed. Of this sample, 15,313 individuals answered the baseline  
4 survey (response rate = 52.1%).[13] The exclusion criteria were: a) people who had difficulty  
5 in performing activities of daily living as a result of disabilities; b) people who did not  
6 provide baseline information ( $n=579$ ); c) people who did not provide social support  
7 information ( $n = 1359$ ); and d) people did not provide a school district code ( $n = 2,343$ ).  
8  
9  
10  
11  
12  
13  
14  
15 Ultimately, 11,032 subjects (5,627 women and 5,405 men) were included in this analysis.

16  
17 The ethics committee of Research of Human Subjects at the Nihon Fukushi  
18 University evaluated and approved the use of the JAGES protocol (approval number 13-14).  
19  
20  
21  
22  
23  
24  
25  
26  
27  
28  
29  
30  
31  
32  
33  
34  
35  
36  
37  
38  
39  
40  
41  
42  
43  
44  
45  
46  
47  
48  
49  
50  
51  
52  
53  
54  
55  
56  
57  
58  
59  
60  
Consent to participate in the study was indicated by a written explanation at the beginning of  
the questionnaire and by the response received on the questionnaire.

### **Follow-up**

The evaluation parameters of the JAGES Project included health status, functional  
deterioration, and mental impairment amongst older Japanese people who were not  
institutionalized. In Japan, there is a long-term care insurance system that covers both  
institutional and community-based caregiving. Individuals aged 65 years or above qualify to  
receive benefits on the strict basis of physical and cognitive disability. The follow-up began  
on November 1, 2003. Dementia-associated data from the six municipalities (specifically in  
terms of the onset) was assessed until March 28, 2013.

### **Outcome variables**

Dementia was graded on a scale that includes categories from I to IV, and M based on the  
Activities of Daily Living Independence Assessment Criteria for Older Individuals with  
Dementia. The Degree of Autonomy in the Daily Lives of Older Individuals with Dementia  
Scale, created by the Ministry of Health, Labor, and Welfare of Japan, evaluates an

1  
2  
3 individual's ability to carry out daily tasks associated with living on a scale that includes  
4  
5 categories from I to IV and M.  
6

7  
8 This scale was validated based on its high association with the Mini-Mental State  
9  
10 Evaluation.[13, 17] A score of I indicates that the patient suffers from some level of cognitive  
11  
12 decline but remains able to perform domestic and social tasks nearly independently. A score  
13  
14 of II indicates that the patient has certain symptoms or behaviors indicative of cognitive  
15  
16 impairment and challenges in communication that may hamper the performance of daily  
17  
18 tasks, although some amount of external assistance is needed to facilitate routine function. A  
19  
20 score of III indicates that the patient periodically exhibits symptoms indicating  
21  
22 communication challenges or symptoms/behaviors, which may interfere with the  
23  
24 performance of daily tasks, necessitating external assistance. A score of IV indicates that the  
25  
26 patient usually shows communication or behavioral challenges, which hampers performing  
27  
28 daily tasks, necessitating frequent care. Finally, a score of M is used when the patient shows  
29  
30 significant cognitive impairment, displays difficult behavior, or has a serious physical illness,  
31  
32 requiring expert medical intervention.[18, 19]  
33  
34  
35  
36  
37  
38  
39

#### 40 **Explanatory variables**

41  
42 An aggregate of individual-level background data was acquired for the 44 school-based  
43  
44 districts to evaluate community social support. An aggregate of responses for individual-level  
45  
46 social support among the school districts was used as an indicator of community social  
47  
48 support. Within the Japanese context, school districts (or primary schools) are primary  
49  
50 residential units of individuals within rural zones. Generally, school districts comprise  
51  
52 geographical settings where older individuals may readily travel via foot or bicycle.[20]  
53  
54 Individual-level social support was assessed based on four dimensions of the Two-Way  
55  
56 Social Support Scale.[12] The four types of support included: (a) receiving support at the  
57  
58  
59  
60

1  
2  
3 emotional level, (b) providing support at the emotional level, (c) receiving support at the  
4  
5 instrumental level, and (d) providing support at the instrumental level.  
6  
7

8 A single item measured each support, “If you or others required additional daily  
9  
10 assistance, who would you depend upon to assist or to be assisted by?” Receiving emotional  
11  
12 support was conceptualized as the perception of the respondent’s complaints or fears by an  
13  
14 individual (e.g., “Do you have someone who listens to your concerns and complaints? Circle  
15  
16 all that apply. Options included family living together, separated children and relatives,  
17  
18 acquaintance/friends/neighbors”). Providing emotional support was conceptualized as the  
19  
20 expression of complaints or fears by an individual to the respondents (e.g., “Do you listen to  
21  
22 someone’s concerns or complaints? Circle the numbers of all the answers that apply. Options  
23  
24 include family living together, separated children and relatives, acquaintances/ friends/  
25  
26 neighbors”). Receiving instrumental support was conceived as the rendering of care to the  
27  
28 respondent by an individual, if the respondent were ill for many days (Question: “Do you  
29  
30 have someone who looks after you when you are sick and confined to a bed for a few days?  
31  
32 Circle the numbers of all the answers that apply. Options include family living together,  
33  
34 separated children and relatives, acquaintance/friends/neighbors”). Providing instrumental  
35  
36 support was defined as nursing of an individual by the respondent if they were ill for many  
37  
38 days (e.g., “Do you look after someone when he/she is sick and confined to a bed for a few  
39  
40 days? Circle the numbers of all the answers that apply. Options include family living  
41  
42 together, separated children and relatives, acquaintance/friends/neighbors”).  
43  
44  
45  
46  
47  
48

49 The percentage of people who responded to each item was considered while  
50  
51 determining the level of social support. An aggregation of the responses to the survey items,  
52  
53 apropos the four dimensions of social support, was performed for the 44 local districts and  
54  
55 further, considered community social support indicators.[12]  
56  
57  
58  
59  
60

## Covariates

Other explanatory variables included: gender (female, male), age (65–69, 70–74, 75–79, 80–84, and 85 years or older), living conditions (accompanied/unaccompanied), marital status (married, never married, divorced, widowed, other/missing), education ( $\geq 13$  years, 10–12 years, 6–9 years,  $< 6$  years, other/missing), present illness (no, yes, missing), depressive symptoms evaluated by the GDS-15 (Geriatric Depression Scale: no depression 0–4 points, mild depression 5–9 points, depression 10–15 points, missing), smoking status (never, former, current, missing), alcohol consumption (no, do not drink every day, drink every day  $\leq 35$  g/day, drink every day  $> 35$  g/day, missing), and individual social support.

## Statistical analysis

This prospective study employed multilevel survival analysis. The data of 11,032 people living in 44 local districts were used in this study. The multilevel analysis framework relied on the assumption that the health outcome of individuals is partially affected by the district in which they live. The multilevel model evaluated the change in outcome across districts (random effects) and the influences of community-level factors on the outcome, accounting for specific constituent features (fixed effects). Multilevel survival analysis was employed to compute the hazard ratio (HR) and 95% confidence interval (CI) for the onset of dementia at follow-up. The HR of the social support variable was determined as the 1% variation in the proportion of aggregated social support. For the analyses, each of the four social support indicators at the community level was concurrently adjusted. Furthermore, three sensitivity analyses were conducted, excluding (i) one year, (ii) two years, and (iii) three years after baseline. The STATA SE version 13 (Stata Corp., College Station, TX, USA) was used to conduct the analyses.

## Patient and public involvement

The patients and public were not involved in the design, conduct, reporting, or dissemination plans of our research.

## RESULTS

During the 9.4-year follow-up period (mean=7.9 person-years; standard deviation [SD] =2.5 person-years), dementia onset was observed in 1,776 individuals (16.1%). Supplementary Table S1 (view as supplementary data online) shows the baseline characteristics and frequency of dementia for every 1,000 people/year. The incidence rate of dementia was higher in those who were female, older, living alone, widowed or divorced, those having less than 6 years of education with an existing illness and with a higher score on GDS-15. It was also higher for those who did not consume alcohol, did not get support at the emotional level, did not offer support at the emotional level, and did not receive help at the instrumental level, compared with each counterpart category.

Table 1 shows the mean, range, median, correlation matrix, and SD of the community-level social support indicators in the 44 districts. Spearman's correlation coefficients ranged from -.11 to .44. The average proportion of people receiving community level emotional support was 89.9%, with a range of 82.7% to 93.5%. The proportion of people receiving community level emotional support was moderately correlated with the proportion of people receiving instrumental support ( $p = .44$ ).

**Table 1** Characteristics and Spearman's correlation coefficient matrices for community level social support indicators ( $N = 44$  school districts)

|                                                   | %    | SD  | Min  | Max  | Spearman's Rank Correlation |      |      |
|---------------------------------------------------|------|-----|------|------|-----------------------------|------|------|
|                                                   |      |     |      |      | Coefficient                 |      |      |
|                                                   |      |     |      |      | 1.                          | 2.   | 3.   |
| 1. Community-level receiving emotional support    | 89.9 | 2.0 | 82.7 | 93.5 | --                          |      |      |
| 2. Community-level providing emotional support    | 83.1 | 2.2 | 76.1 | 88.6 | -.11*                       | --   |      |
| 3. Community-level receiving instrumental support | 94.0 | 1.6 | 91.3 | 97.6 | .44*                        | .08* | --   |
| 4. Community-level providing instrumental support | 91.9 | 2.1 | 85.6 | 97.9 | -.01                        | .41* | .26* |

*SD*, standard deviation; Min, minimum; Max, maximum; \*  $p < .05$

The results of the multilevel survival analyses (Model 1) for the onset of incident dementia with three sensitivity analyses models (Model 2, 3, and 4) are shown in Supplementary Table S2 (view as supplementary data online). Regarding community-level social support, in Model 1, a significant association was observed between the onset of incident dementia and the proportion of people receiving community level emotional support (HR=0.96; 95% CI=0.94-0.99). On the contrary, significant correlations or relationship between the onset of incident dementia and other community-level social support were absent. In Model 2 of a sensitivity analysis (excluding 1 year after baseline), significant correlations between the onset of incident dementia and receiving community-level emotional support (HR=0.97; 95% CI=0.94-0.99) remained. Model 3 (excluding 2 years after baseline)

1  
2  
3 and Model 4 (excluding 3 years after baseline) showed similar results to Models 1 and 2.

4  
5 Regarding individual-level social support, in Model 1, the incidence of dementia was  
6  
7 significantly associated with community-level emotional support (HR=0.83; 95% CI=0.73-  
8  
9 0.94) as well as instrumental support (HR=0.83; 95% CI=0.73-0.94).

## 14 15 **DISCUSSION**

16  
17 To our knowledge, this is the first study to evaluate community-level social support using  
18  
19 multilevel survival analysis to investigate the onset of dementia in a large sample of older  
20  
21 community-dwelling individuals. There was a prospective association between living in a  
22  
23 community with a higher level of social support and a lower occurrence of dementia during  
24  
25 the 10-year study period. However, only one of the community-level social support indicators  
26  
27 was significantly associated with dementia onset. The outcome of this research has  
28  
29 significant implications for public health. Among older people, a 1% rise in receiving  
30  
31 community-level emotional support correlated with an approximately 4% decrease in the  
32  
33 incidence of dementia, irrespective of socio-demographic factors and health circumstances.  
34  
35  
36

37  
38 For individual-level social support, providing social support was significantly  
39  
40 correlated with a lower risk for dementia. A previous study indicated that providing  
41  
42 emotional and instrumental support at the individual level might be a risk factor for the onset  
43  
44 of depression.[12] A previous study by Murata and colleagues [21] examined the association  
45  
46 between individual-level social support and dementia development in a 10-year cohort. The  
47  
48 results showed that receipt of support from friends and neighbors was associated with a lower  
49  
50 risk of developing dementia for both men and women. Nonetheless, people who were  
51  
52 providing social support might be less likely to develop dementia.  
53  
54

55  
56 In the present study, among the four kinds of community social support, only  
57  
58 community-level emotional support affected the onset of incident dementia, even after  
59  
60

1  
2  
3 adjustment for individual-level social support. Two reasons might contribute to this finding.  
4  
5 First, a community where people receive high emotional support from each other might be a  
6  
7 place where older people are less likely to feel lonely. Indeed, loneliness was found to predict  
8  
9 dementia in a previous study.[22] Second, in areas rich in receiving community-level  
10  
11 emotional support, there may be older people who maintain a good relationship with their  
12  
13 children. A previous study indicated that positive experiences of receiving social support  
14  
15 from children predicted the onset of dementia.[23] In the current study, social support from  
16  
17 children was evaluated through three questions: “To what extent do they actually comprehend  
18  
19 your feelings about things?” “How much can you depend on them if you experience a critical  
20  
21 problem?” and “How much can you open up to them if you need to talk about your fears?” A  
22  
23 place where many people receive emotional support may be a place where people generally  
24  
25 have good interpersonal relationships. Therefore, a community-level indicator of receiving  
26  
27 emotional support may only be associated with the onset of dementia.  
28  
29  
30  
31  
32

33  
34 Community social support may be an element of social capital or community-level  
35  
36 social relationships. For this reason, several plausible pathways between receiving  
37  
38 community level emotional support and onset of incident dementia were found in the current  
39  
40 study. First, community-level social support may influence people’s health by shaping health-  
41  
42 associated behaviors. This may be done through faster dissemination of health-related  
43  
44 information or by increasing the probability of people taking up healthy standards of behavior  
45  
46 and moderating behaviors that have negative effects on health. Second, social support may  
47  
48 shape health by enhancing the accessibility of local services and facilities. Social  
49  
50 involvement of older people may be fostered by accessing services, including transportation,  
51  
52 recreational spaces, and community hubs may foster, thus, restricting or arresting the  
53  
54 development of dementia. Third, community social support has the potential to foster good  
55  
56 cognitive health by minimizing psychological distress. Fourth, places with higher social  
57  
58  
59  
60



1  
2  
3 support at the community level generate greater egalitarian political involvement trends. This  
4  
5 may lead to the execution of policies that ensure the safety of community members.  
6  
7

8 It is critical to mention the possible limitations associated with the present study.

9  
10 First, the response rate to the survey (52.1%) could affect the generalizability of the results.

11  
12 Second, there was no information about the type of dementia diagnoses (for instance,  
13  
14 Alzheimer's disease, cerebrovascular dementia, or dementia with Lewy bodies). Third, the  
15  
16 sample did not fully reflect the older population in Japan because the study subjects were  
17  
18 recruited from a single prefecture. Therefore, the findings cannot be generalized to urban  
19  
20 areas or places where the population has distinct characteristics. Finally, other community-  
21  
22 level social relationships, including social capital, were not evaluated. However, we plan to  
23  
24 assess a wider range of community-level factors in subsequent studies.  
25  
26  
27  
28  
29

## 30 **CONCLUSIONS**

31  
32  
33 The results of this study showed that a higher level of social support at the community level  
34  
35 is related to a lower incidence of dementia after adjusting for individual-level social support  
36  
37 among older individuals. A community level social support indicator (an aggregated value of  
38  
39 receiving emotional support) showed a significant association with dementia onset. The  
40  
41 present prospective study suggests that receiving emotional support at the community level  
42  
43 may result in a lower level of incident dementia among community-dwelling older  
44  
45 individuals in Japan.  
46  
47  
48  
49

## 50 **Acknowledgements**

51  
52 Editorial support in the form of medical writing was obtained from Editage.  
53  
54  
55  
56  
57

## 58 **Competing Interests**

None of the authors have a conflict of interest to declare.

## Funding

This study used data from the Japan Gerontological Evaluation Study (JAGES), which was supported by the Ministry of Education, Culture, Sports, Science and Technology-Japan (MEXT)-Supported Program for the Strategic Research Foundation at Private Universities (grant number 2009-2013), Japan Society for the Promotion of Science (JSPS) KAKENHI (grant numbers JP18390200, JP22330172, JP22390400, JP23243070, JP23590786, JP23790710, JP24390469, JP24530698, JP24683018, JP25253052, JP25870573, JP25870881, JP26285138, JP26882010, JP15H01972, and 17K15822), Health Labour Sciences Research Grants (grant numbers H22-Choju-Shitei-008, H24-Junkanki [Seishu] Ippan-007, H24-Chikyukibo-Ippan-009, H24-Choju-Wakate-009, H25-Kenki-Wakate-015, H25-Choju-Ippan-003, H26-Irryo-Shitei-003 [Fukkou], H26-Choju-Ippan-006, H27-Ninchisyou-Ippan-001, H28-choju-Ippan-002, H28Ninchisyou-Ippan-002, H30-Kenki-Ippan-006, and H30-Junkankitou-Ippan-004), Japan Agency for Medical Research and development (AMED) (grant numbers JP17dk0110017, JP18dk0110027, JP18ls0110002, and JP18le0110009), and the Research Funding for Longevity Sciences from National Center for Geriatrics and Gerontology (grant numbers 24-17, 24-23, 29-42, and 30-22). The views and opinions expressed in this article are those of the authors and do not necessarily reflect the official policy or position of the respective funding organizations.

## Author contributions

YM conceived the research idea, participated in the study design, performed statistical analysis, and prepared the manuscript as the primary author. TT developed the research idea, participated in the study design, cooperated in the statistical analysis, and revised the

1  
2  
3 manuscript. JA and MS assisted in the data analysis and reviewed the manuscript. TT and YS  
4  
5 acquired data, collaborated in statistical analysis, and revised the manuscript. As the lead  
6  
7 researcher of the JAGES project, KK helped to conceptualize the study. The final manuscript  
8  
9 was read and approved by all authors.  
10  
11  
12  
13  
14

### 15 **Data sharing statement**

16  
17 Data are available upon reasonable request  
18  
19  
20  
21  
22  
23  
24  
25  
26  
27  
28  
29  
30  
31  
32  
33  
34  
35  
36  
37  
38  
39  
40  
41  
42  
43  
44  
45  
46  
47  
48  
49  
50  
51  
52  
53  
54  
55  
56  
57  
58  
59  
60

## References

1. Prince M, Wimo A, Guerchet M, et al. *World Alzheimer Report 2015: The Global Impact of Dementia: An Analysis of Prevalence, Incidence, Cost and Trends* [online report]. London: Alzheimer's Disease International 2015.  
<https://www.alz.co.uk/research/WorldAlzheimerReport2015.pdf>
2. Ministry of Health Law, 2017. <https://www.mhlw.go.jp/content/000522832.pdf>
3. Middleton LE, Yaffe K. Promising strategies for the prevention of dementia. *Arch Neurol* 2009;66(10):1210–15. doi: 10.1001/archneurol.2009.201
4. Fratiglioni L, Paillard-Borg S, Winblad B. (2004). An active and socially integrated lifestyle in late life might protect against dementia. *Lancet Neurol* 2004;3(6):343–53. doi: 10.1016/s1474-4422(04)00767-7
5. Gao S, Hendrie HC, Hall KS, et al. The relationships between age, sex, and the incidence of dementia and Alzheimer disease: a meta-analysis. *Arch Gen Psychiatry* 1998;55(9):809–15. doi: 10.1001/archpsyc.55.9.809
6. Livingstone G, Sommerlad A, Orgeta V, et al. Dementia prevention, intervention, and care. *Lancet* 2017;390(10113):2673–734. [https://doi.org/10.1016/S0140-6736\(17\)31363-6](https://doi.org/10.1016/S0140-6736(17)31363-6)
7. Norton MC, Dew J, Smith H, et al. Lifestyle behavior pattern is associated with different levels of risk for incident dementia and Alzheimer's disease: the Cache County Study. *J Am Geriatr Soc* 2012;60(3):405–12. doi: 10.1111/j.1532-5415.2011.03860.x
8. Patterson C, Feightner JW, Garcia A, et al. Diagnosis and treatment of dementia: 1. Risk assessment and primary prevention of Alzheimer disease. *CMAJ* 2008;178(5):548–56. doi: 10.1503/cmaj.070796

- 1  
2  
3 9. Santini ZI, Koyanagi A, Tyrovolas S, et al. The association between social  
4 relationships and depression: a systematic review. *J Affect Disord* 2015;175:53–65.  
5  
6 doi: 10.1016/j.jad.2014.12.049  
7  
8
- 9  
10 10. Seeman TE, Lusignolo TM, Albert M, et al. Social relationships, social support, and  
11 patterns of cognitive aging in healthy, high-functioning older adults: MacArthur  
12 Studies of Successful Aging. *Health Psychol* 2001;20(4):243–55. doi: 10.1037/0278-  
13 6133.20.4.243  
14  
15
- 16  
17 11. Berkman LF, Kawachi I. Social Epidemiology. New York, NY: Oxford University  
18 Press 2015. doi: 10.1093/med/9780195377903.001.0001  
19  
20
- 21  
22 12. Tsuboi H, Hirai H, Kondo K. Giving social support to outside family may be a  
23 desirable buffer against depressive symptoms in community-dwelling older adults:  
24 Japan Gerontological Evaluation Study. *BioPsychoSoc Med* 2016;10(1):18. doi:  
25 10.1186/s13030-016-0064-6  
26  
27
- 28  
29 13. Saito T, Murata C, Saito M, et al. Influence of social relationship domains and their  
30 combinations on incident dementia: a prospective cohort study. *J Epidemiol*  
31 *Community Health* 2017;72(1):7–12. doi: 10.1136/jech-2017-209811  
32  
33
- 34  
35 14. Aida J, Kondo K, Kawachi I, et al. Does social capital affect the incidence of  
36 functional disability in older Japanese? A prospective population-based cohort study.  
37 *J Epidemiol Community Health* 2012;67(1):42–7. doi: 10.1136/jech-2011-200307  
38  
39
- 40  
41 15. Murayama H, Sugiyama M, Inagaki H, et al. Is community social capital associated  
42 with subjective symptoms of dementia among older people? A cross-sectional study  
43 in Japan. *Geriatr Gerontol Int*. 2018;18(11):1537–42. doi:10.1111/ggi.13519  
44  
45
- 46  
47 16. Nishi A, Kondo K, Hirai H, et al. (2011). Cohort Profile: The AGES 2003 Cohort  
48 Study in Aichi, Japan. *J Epidemiol* 2011;21(2):151–7. doi: 10.2188/jea.je20100135  
49  
50  
51  
52  
53  
54  
55  
56  
57  
58  
59  
60

- 1  
2  
3  
4  
5  
6  
7  
8  
9  
10  
11  
12  
13  
14  
15  
16  
17  
18  
19  
20  
21  
22  
23  
24  
25  
26  
27  
28  
29  
30  
31  
32  
33  
34  
35  
36  
37  
38  
39  
40  
41  
42  
43  
44  
45  
46  
47  
48  
49  
50  
51  
52  
53  
54  
55  
56  
57  
58  
59  
60
17. Hisano S. (2009). The relationship between Revised Hasegawa Dementia Scale (HDS-R), Mini-Mental State Examination (MMSE) and Bed-fast Scale, Dementia Scale. *Nihon Ronen Igakkai Zasshi* 2009;20(8):883–91.
  18. Hikichi H, Tsuboya T, Aida J, et al. Social capital and cognitive decline after a natural disaster—Authors reply. *Lancet Planet Health* 2017;1(6):E219. doi: 10.1016/s2542-5196(17)30098-0
  19. Yamamoto T, Kondo K, Hirai H, et al. (2012). Association Between Self-Reported Dental Health Status and Onset of Dementia. *Psychosom Medi* 2012;74(3):241–8. doi: 10.1097/psy.0b013e318246dffb
  20. Takagi D, Kondo K, Kawachi I. Social participation and mental health: moderating effects of gender, social role and rurality. *BMC Public Health* 2013;13(1):701. doi: 10.1186/1471-2458-13-701
  21. Murata C, Saito T, Saito M, et al. (2019). The association between social support and incident dementia: a 10-year follow-up study in Japan. *Int J Environ Res Public Health* 2019;16(2):239. doi: 10.3390/ijerph16020239
  22. Holwerda TJ, Deeg DJH, Beekman ATF, et al. Feelings of loneliness, but not social isolation, predict dementia onset: results from the Amsterdam Study of the Elderly (AMSTEL). *J Neurol Neurosurg Psychiatry* 2012;85(2):135–42. doi: 10.1136/jnnp-2012-302755
  23. Khondoker M, Rafnsson SB, Morris S, et al. Positive and negative experiences of social support and risk of dementia in later life: an investigation using the English Longitudinal Study of Ageing. *J Alzheimers Dis* 2017;58(1):99–108. doi: 10.3233/jad-161160

Supplementary Table S1. Descriptive characteristics of study respondents (N = 11,032)

|                                   |          |          | Incidence Rate (IR) per 1000 person-years |                | Patients with Dementia (n = 1,776, 16.1%) |          |
|-----------------------------------|----------|----------|-------------------------------------------|----------------|-------------------------------------------|----------|
| <i>Individual-Level variables</i> | <i>n</i> | <i>%</i> | IR                                        | 95% CI         | <i>n</i>                                  | <i>%</i> |
| <b>Sex</b>                        |          |          |                                           |                |                                           |          |
| Male                              | 5,405    | 49.0     | 0.049                                     | [0.045, 0.052] | 746                                       | 13.8     |
| Female                            | 5,627    | 51.0     | 0.062                                     | [0.058,0.066]  | 1,030                                     | 18.3     |
| <b>Age (years)</b>                |          |          |                                           |                |                                           |          |
| 65-69                             | 4,065    | 36.9     | 0.016                                     | [0.014,0.018]  | 207                                       | 5.1      |
| 70-74                             | 3,280    | 29.7     | 0.044                                     | [0.040,0.048]  | 428                                       | 13.1     |
| 75-79                             | 2,228    | 20.2     | 0.090                                     | [0.083,0.098]  | 548                                       | 24.6     |
| 80-84                             | 1,012    | 9.2      | 0.158                                     | [0.143,0.175]  | 376                                       | 37.2     |
| 85+                               | 447      | 4.1      | 0.289                                     | [0.253,0.330]  | 217                                       | 48.6     |
| <b>Living Alone</b>               |          |          |                                           |                |                                           |          |
| No                                | 9,959    | 90.3     | 0.054                                     | [0.051,0.057]  | 1,558                                     | 15.6     |
| Yes                               | 1,073    | 9.7      | 0.073                                     | [0.064,0.083]  | 218                                       | 20.3     |

## Marital Status

|                     |       |      |       |               |       |      |
|---------------------|-------|------|-------|---------------|-------|------|
| Married             | 7,905 | 71.7 | 0.044 | [0.042,0.047] | 1,038 | 13.1 |
| Widowed or divorced | 2,745 | 24.9 | 0.089 | [0.082,0.096] | 658   | 24.0 |
| Never married       | 190   | 1.7  | 0.063 | [0.033,0.121] | 41    | 21.6 |
| Other/Missing       | 192   | 1.7  | 0.071 | [0.052,0.097] | 39    | 20.3 |

## Education (years)

|               |       |      |       |               |     |      |
|---------------|-------|------|-------|---------------|-----|------|
| ≥13           | 455   | 4.1  | 0.046 | [0.039,0.053] | 171 | 37.6 |
| 10–12         | 6,002 | 54.4 | 0.048 | [0.044,0.052] | 963 | 16.0 |
| 6–9           | 3,341 | 30.3 | 0.055 | [0.052,0.059] | 470 | 14.1 |
| <6            | 1,132 | 10.3 | 0.156 | [0.134,0.181] | 149 | 13.2 |
| Other/Missing | 102   | 0.9  | 0.081 | [0.054,0.121] | 23  | 22.6 |

## Present Illness

|         |       |      |       |               |       |      |
|---------|-------|------|-------|---------------|-------|------|
| No      | 2,906 | 26.3 | 0.040 | [0.036,0.045] | 354   | 12.2 |
| Yes     | 7,679 | 69.6 | 0.062 | [0.059,0.065] | 1,348 | 17.6 |
| Missing | 447   | 4.1  | 0.058 | [0.046,0.072] | 74    | 16.6 |

## GDS-15



|    |  |                                 |       |      |       |               |            |
|----|--|---------------------------------|-------|------|-------|---------------|------------|
| 1  |  |                                 |       |      |       |               |            |
| 2  |  |                                 |       |      |       |               |            |
| 3  |  | 0–4                             | 6,737 | 61.1 | 0.043 | [0.040,0.045] | 857 12.7   |
| 4  |  |                                 |       |      |       |               |            |
| 5  |  | 5–9                             | 2,234 | 20.3 | 0.073 | [0.067,0.080] | 450 20.1   |
| 6  |  |                                 |       |      |       |               |            |
| 7  |  | 10–15                           | 644   | 5.8  | 0.106 | [0.091,0.123] | 170 26.4   |
| 8  |  |                                 |       |      |       |               |            |
| 9  |  | Missing                         | 1,417 | 12.8 | 0.076 | [0.068,0.085] | 299 21.1   |
| 10 |  |                                 |       |      |       |               |            |
| 11 |  |                                 |       |      |       |               |            |
| 12 |  | Smoking Status                  |       |      |       |               |            |
| 13 |  |                                 |       |      |       |               |            |
| 14 |  | Never                           | 6,501 | 58.9 | 0.059 | [0.056,0.063] | 1,129 17.4 |
| 15 |  |                                 |       |      |       |               |            |
| 16 |  | Former                          | 2,757 | 25.0 | 0.047 | [0.042,0.052] | 367 13.3   |
| 17 |  |                                 |       |      |       |               |            |
| 18 |  | Current                         | 1,396 | 12.7 | 0.055 | [0.048,0.063] | 213 15.3   |
| 19 |  |                                 |       |      |       |               |            |
| 20 |  | Missing                         | 378   | 3.4  | 0.063 | [0.050,0.080] | 67 17.7    |
| 21 |  |                                 |       |      |       |               |            |
| 22 |  |                                 |       |      |       |               |            |
| 23 |  | Alcohol Consumption             |       |      |       |               |            |
| 24 |  |                                 |       |      |       |               |            |
| 25 |  | None                            | 7,094 | 64.3 | 0.063 | [0.059,0.066] | 1,268 17.9 |
| 26 |  |                                 |       |      |       |               |            |
| 27 |  | Not drink every day             | 1,513 | 13.7 | 0.042 | [0.036,0.048] | 188 12.4   |
| 28 |  |                                 |       |      |       |               |            |
| 29 |  | Drink every day $\leq$ 35 g/day | 1,769 | 16.0 | 0.045 | [0.039,0.051] | 233 13.2   |
| 30 |  |                                 |       |      |       |               |            |
| 31 |  | Drink every day $>$ 35 g/day    | 495   | 4.5  | 0.033 | [0.025,0.044] | 49 9.9     |
| 32 |  |                                 |       |      |       |               |            |
| 33 |  | Missing                         | 161   | 1.5  | 0.085 | [0.062,0.117] | 38 23.6    |
| 34 |  |                                 |       |      |       |               |            |
| 35 |  |                                 |       |      |       |               |            |
| 36 |  |                                 |       |      |       |               |            |
| 37 |  | Social Support                  |       |      |       |               |            |
| 38 |  |                                 |       |      |       |               |            |
| 39 |  |                                 |       |      |       |               |            |
| 40 |  |                                 |       |      |       |               |            |
| 41 |  |                                 |       |      |       |               |            |
| 42 |  |                                 |       |      |       |               |            |
| 43 |  |                                 |       |      |       |               |            |
| 44 |  |                                 |       |      |       |               |            |
| 45 |  |                                 |       |      |       |               |            |
| 46 |  |                                 |       |      |       |               |            |

## Receiving Emotional Support

|     |       |      |       |               |       |      |
|-----|-------|------|-------|---------------|-------|------|
| No  | 1,089 | 9.9  | 0.070 | [0.061,0.080] | 208   | 19.1 |
| Yes | 9,943 | 90.1 | 0.054 | [0.052,0.057] | 1,568 | 15.8 |

## Providing Emotional Support

|     |       |      |       |               |       |      |
|-----|-------|------|-------|---------------|-------|------|
| No  | 1,836 | 16.6 | 0.085 | [0.077,0.094] | 409   | 22.3 |
| Yes | 9,196 | 83.4 | 0.051 | [0.048,0.053] | 1,367 | 14.9 |

## Receiving Instrumental Support

|     |        |      |       |               |       |      |
|-----|--------|------|-------|---------------|-------|------|
| No  | 868    | 7.9  | 0.063 | [0.053,0.076] | 112   | 18.1 |
| Yes | 10,164 | 92.1 | 0.055 | [0.053,0.058] | 1,664 | 16.0 |

## Providing Instrumental Support

|     |        |      |       |               |       |      |
|-----|--------|------|-------|---------------|-------|------|
| No  | 619    | 5.6  | 0.113 | [0.100,0.128] | 250   | 28.8 |
| Yes | 10,413 | 94.4 | 0.051 | [0.049,0.054] | 1,526 | 15.0 |

---

**Supplementary Table S2.** Results of multilevel survival analyses for the onset of incident dementia

|                                         | Model 1           | Model 2 (1 year)  | Model 3 (2 year)  | Model 4 (3 year)  |
|-----------------------------------------|-------------------|-------------------|-------------------|-------------------|
|                                         | <i>n</i> = 11,032 | <i>n</i> = 10,780 | <i>n</i> = 10,440 | <i>n</i> = 10,071 |
| <i>Fixed Effect</i>                     | HR (95% CI)       | HR (95% CI)       | HR (95% CI)       | HR (95% CI)       |
| <i>Community-Level Variables</i>        |                   |                   |                   |                   |
| Rate of receiving emotional support*    | 0.96 (0.94–0.99)  | 0.97 (0.94–0.99)  | 0.97 (0.94–0.99)  | 0.97 (0.94–0.99)  |
| Rate of providing emotional support*    | 0.99 (0.96–1.01)  | 0.99 (0.96–1.01)  | 0.98 (0.95–1.01)  | 0.98 (0.95–1.01)  |
| Rate of receiving instrumental support* | 1.01 (0.97–1.04)  | 1.01 (0.97–1.04)  | 1.01 (0.97–1.05)  | 1.01 (0.97–1.06)  |
| Rate of providing instrumental support* | 1.00 (0.97–1.03)  | 1.00 (0.97–1.02)  | 1.00 (0.97–1.03)  | 1.00 (0.97–1.04)  |
| <i>Individual-Level Variables</i>       |                   |                   |                   |                   |
| Social Support                          |                   |                   |                   |                   |
| Receiving Emotional Support             |                   |                   |                   |                   |
| No                                      | 1.0 (reference)   | 1.0 (reference)   | 1.0 (reference)   | 1.0 (reference)   |
| Yes                                     | 1.04 (0.88–1.22)  | 1.03 (0.87–1.22)  | 1.03 (0.87–1.23)  | 0.99 (0.83–1.19)  |
| Providing Emotional Support             |                   |                   |                   |                   |

|    |                                |                   |                    |                    |                    |
|----|--------------------------------|-------------------|--------------------|--------------------|--------------------|
| 1  |                                |                   |                    |                    |                    |
| 2  |                                |                   |                    |                    |                    |
| 3  | No                             | 1.0 (reference)   | 1.0 (reference)    | 1.0 (reference)    | 1.0 (reference)    |
| 4  |                                |                   |                    |                    |                    |
| 5  | Yes                            | 0.83 (0.73–0.94)  | 0.88 (0.77–0.99)   | 0.91 (0.80–1.04)   | 0.91 (0.79–1.05)   |
| 6  |                                |                   |                    |                    |                    |
| 7  |                                |                   |                    |                    |                    |
| 8  | Receiving Instrumental Support |                   |                    |                    |                    |
| 9  |                                |                   |                    |                    |                    |
| 10 | No                             | 1.0 (reference)   | 1.0 (reference)    | 1.0 (reference)    | 1.0 (reference)    |
| 11 |                                |                   |                    |                    |                    |
| 12 | Yes                            | 1.22 (0.99–1.51)  | 1.18 (0.95–1.47)   | 1.13 (0.90–1.42)   | 1.15 (0.91–1.47)   |
| 13 |                                |                   |                    |                    |                    |
| 14 |                                |                   |                    |                    |                    |
| 15 | Providing Instrumental Support |                   |                    |                    |                    |
| 16 |                                |                   |                    |                    |                    |
| 17 | No                             | 1.0 (reference)   | 1.0 (reference)    | 1.0 (reference)    | 1.0 (reference)    |
| 18 |                                |                   |                    |                    |                    |
| 19 | Yes                            | 0.76 (0.66–0.89)  | 0.82 (0.70–0.96)   | 0.85 (0.72–1.01)   | 0.89 (0.74–1.07)   |
| 20 |                                |                   |                    |                    |                    |
| 21 |                                |                   |                    |                    |                    |
| 22 | Sex                            |                   |                    |                    |                    |
| 23 |                                |                   |                    |                    |                    |
| 24 | Male                           | 1.0 (reference)   | 1.0 (reference)    | 1.0 (reference)    | 1.0 (reference)    |
| 25 |                                |                   |                    |                    |                    |
| 26 | Female                         | 1.01 (0.87–1.18)  | 1.03 (0.88–1.20)   | 1.06 (0.90–1.24)   | 1.08 (0.91–1.28)   |
| 27 |                                |                   |                    |                    |                    |
| 28 |                                |                   |                    |                    |                    |
| 29 | Age (years)                    |                   |                    |                    |                    |
| 30 |                                |                   |                    |                    |                    |
| 31 | 65–69                          | 1.0 (reference)   | 1.0 (reference)    | 1.0 (reference)    | 1.0 (reference)    |
| 32 |                                |                   |                    |                    |                    |
| 33 | 70–74                          | 2.64 (2.23–3.12)  | 2.67 (2.25–3.16)   | 2.65 (2.22–3.16)   | 2.71 (2.26–3.25)   |
| 34 |                                |                   |                    |                    |                    |
| 35 | 75–79                          | 5.42 (4.60–6.38)  | 5.59 (4.73–6.61)   | 5.84 (4.93–6.93)   | 5.97 (5.00–7.13)   |
| 36 |                                |                   |                    |                    |                    |
| 37 | 80–84                          | 9.85 (8.24–11.78) | 10.08 (8.40–12.10) | 10.30 (8.53–12.43) | 10.31 (8.46–12.56) |
| 38 |                                |                   |                    |                    |                    |
| 39 |                                |                   |                    |                    |                    |
| 40 |                                |                   |                    |                    |                    |
| 41 |                                |                   |                    |                    |                    |
| 42 |                                |                   |                    |                    |                    |
| 43 |                                |                   |                    |                    |                    |
| 44 |                                |                   |                    |                    |                    |
| 45 |                                |                   |                    |                    |                    |
| 46 |                                |                   |                    |                    |                    |

|    |                     |                     |                     |                     |                     |
|----|---------------------|---------------------|---------------------|---------------------|---------------------|
| 1  |                     |                     |                     |                     |                     |
| 2  |                     |                     |                     |                     |                     |
| 3  | 85+                 |                     |                     |                     |                     |
| 4  |                     | 19.01 (15.38–23.50) | 19.32 (15.52–24.06) | 19.32 (15.33–24.34) | 18.64 (14.52–23.92) |
| 5  |                     |                     |                     |                     |                     |
| 6  |                     |                     |                     |                     |                     |
| 7  |                     |                     |                     |                     |                     |
| 8  | Living Alone        |                     |                     |                     |                     |
| 9  |                     |                     |                     |                     |                     |
| 10 | No                  | 1.0 (reference)     | 1.0 (reference)     | 1.0 (reference)     | 1.0 (reference)     |
| 11 |                     |                     |                     |                     |                     |
| 12 | Yes                 | 0.94 (0.80–1.11)    | 0.94 (0.79–1.12)    | 0.98 (0.82–1.17)    | 1.03 (0.86–1.24)    |
| 13 |                     |                     |                     |                     |                     |
| 14 |                     |                     |                     |                     |                     |
| 15 | Marital status      |                     |                     |                     |                     |
| 16 |                     |                     |                     |                     |                     |
| 17 | Married             | 1.0 (reference)     | 1.0 (reference)     | 1.0 (reference)     | 1.0 (reference)     |
| 18 |                     |                     |                     |                     |                     |
| 19 | Widowed or Divorced | 1.09 (0.96–1.24)    | 1.09 (0.96–1.24)    | 1.06 (0.92–1.21)    | 1.00 (0.86–1.15)    |
| 20 |                     |                     |                     |                     |                     |
| 21 | Never Married       | 1.28 (0.92–1.78)    | 1.22 (0.87–1.73)    | 1.24 (0.87–1.76)    | 1.25 (0.87–1.79)    |
| 22 |                     |                     |                     |                     |                     |
| 23 |                     |                     |                     |                     |                     |
| 24 | Other/Missing       | 1.12 (0.80–1.56)    | 1.13 (0.80–1.58)    | 1.09 (0.77–1.56)    | 1.09 (0.76–1.57)    |
| 25 |                     |                     |                     |                     |                     |
| 26 | Education (years)   |                     |                     |                     |                     |
| 27 |                     |                     |                     |                     |                     |
| 28 | ≥13                 | 1.0 (reference)     | 1.0 (reference)     | 1.0 (reference)     | 1.0 (reference)     |
| 29 |                     |                     |                     |                     |                     |
| 30 | 10–12               | 0.89 (0.74–1.08)    | 0.89 (0.74–1.08)    | 0.89 (0.73–1.08)    | 0.92 (0.75–1.13)    |
| 31 |                     |                     |                     |                     |                     |
| 32 |                     |                     |                     |                     |                     |
| 33 | 6-9                 | 0.96 (0.80–1.15)    | 0.95 (0.79–1.14)    | 0.95 (0.79–1.15)    | 0.96 (0.79–1.16)    |
| 34 |                     |                     |                     |                     |                     |
| 35 | <6                  | 1.29 (1.02–1.63)    | 1.24 (0.97–1.57)    | 1.22 (0.95–1.57)    | 1.23 (0.95–1.61)    |
| 36 |                     |                     |                     |                     |                     |
| 37 | Other/Missing       | 0.89 (0.57–1.40)    | 0.82 (0.51–1.33)    | 0.80 (0.48–1.33)    | 0.86 (0.51–1.45)    |
| 38 |                     |                     |                     |                     |                     |
| 39 |                     |                     |                     |                     |                     |
| 40 |                     |                     |                     |                     |                     |
| 41 |                     |                     |                     |                     |                     |
| 42 |                     |                     |                     |                     |                     |
| 43 |                     |                     |                     |                     |                     |
| 44 |                     |                     |                     |                     |                     |
| 45 |                     |                     |                     |                     |                     |
| 46 |                     |                     |                     |                     |                     |

## Present Illness

|         |                  |                  |                  |                  |
|---------|------------------|------------------|------------------|------------------|
| No      | 1.0 (reference)  | 1.0 (reference)  | 1.0 (reference)  | 1.0 (reference)  |
| Yes     | 1.15 (1.02–1.30) | 1.13 (1.00–1.28) | 1.13 (1.00–1.28) | 1.10 (0.96–1.26) |
| Missing | 0.96 (0.75–1.24) | 0.98 (0.75–1.27) | 0.99 (0.75–1.29) | 1.01 (0.76–1.33) |

## GDS-15

|         |                  |                  |                  |                  |
|---------|------------------|------------------|------------------|------------------|
| 0-4     | 1.0 (reference)  | 1.0 (reference)  | 1.0 (reference)  | 1.0 (reference)  |
| 5-9     | 1.54 (1.37–1.73) | 1.54 (1.37–1.74) | 1.48 (1.31–1.68) | 1.49 (1.30–1.69) |
| 10-15   | 2.33 (1.96–2.77) | 2.18 (1.82–2.62) | 2.16 (1.79–2.62) | 2.17 (1.78–2.66) |
| Missing | 1.47 (1.28–1.68) | 1.43 (1.25–1.64) | 1.41 (1.22–1.63) | 1.41 (1.22–1.64) |

## Smoking Status

|         |                  |                  |                  |                  |
|---------|------------------|------------------|------------------|------------------|
| Never   | 1.0 (reference)  | 1.0 (reference)  | 1.0 (reference)  | 1.0 (reference)  |
| Former  | 0.99 (0.85–1.16) | 1.00 (0.86–1.18) | 0.99 (0.84–1.17) | 1.02 (0.86–1.21) |
| Current | 1.34 (1.12–1.60) | 1.32 (1.10–1.59) | 1.39 (1.15–1.68) | 1.40 (1.15–1.71) |
| Missing | 0.86 (0.65–1.15) | 0.90 (0.67–1.20) | 0.85 (0.63–1.15) | 0.91 (0.67–1.24) |

## Alcohol Consumption

|      |                 |                 |                 |                 |
|------|-----------------|-----------------|-----------------|-----------------|
| None | 1.0 (reference) | 1.0 (reference) | 1.0 (reference) | 1.0 (reference) |
|------|-----------------|-----------------|-----------------|-----------------|

1  
2  
3  
4  
5  
6  
7  
8  
9  
10  
11  
12  
13  
14  
15  
16  
17  
18  
19  
20  
21  
22  
23  
24  
25  
26  
27  
28  
29  
30  
31  
32  
33  
34  
35  
36  
37  
38  
39  
40  
41  
42  
43  
44  
45  
46

|                            |                  |                  |                  |                  |
|----------------------------|------------------|------------------|------------------|------------------|
| Does not drink every day   | 0.96 (0.82–1.13) | 0.96 (0.81–1.13) | 0.97 (0.82–1.15) | 0.96 (0.80–1.15) |
| Drinks every day ≤35 g/day | 0.98 (0.84–1.15) | 0.99 (0.84–1.16) | 1.02 (0.86–1.20) | 1.03 (0.87–1.22) |
| Drinks every day >35 g/day | 0.86 (0.64–1.17) | 0.90 (0.66–1.21) | 0.92 (0.68–1.26) | 0.91 (0.66–1.26) |
| Missing                    | 1.14 (0.78–1.66) | 1.14 (0.78–1.67) | 1.24 (0.84–1.83) | 1.22 (0.82–1.83) |

*Random effects*

|                               |             |             |             |             |
|-------------------------------|-------------|-------------|-------------|-------------|
| Community-level variance (SE) | 0.06 (0.05) | 0.04 (0.06) | 0.04 (0.07) | 0.09 (0.04) |
|-------------------------------|-------------|-------------|-------------|-------------|

SE, standard error; \*HR for one-point increment of community social support (range: 0-100)

## STROBE Statement—checklist of items that should be included in reports of observational studies

|                              | Item No | Recommendation                                                                                                                                                                                                                                                                                                                                                                                                                                                         | Page No |
|------------------------------|---------|------------------------------------------------------------------------------------------------------------------------------------------------------------------------------------------------------------------------------------------------------------------------------------------------------------------------------------------------------------------------------------------------------------------------------------------------------------------------|---------|
| <b>Title and abstract</b>    | 1       | (a) Indicate the study's design with a commonly used term in the title or the abstract                                                                                                                                                                                                                                                                                                                                                                                 | 1       |
|                              |         | (b) Provide in the abstract an informative and balanced summary of what was done and what was found                                                                                                                                                                                                                                                                                                                                                                    | 2       |
| <b>Introduction</b>          |         |                                                                                                                                                                                                                                                                                                                                                                                                                                                                        |         |
| Background/rationale         | 2       | Explain the scientific background and rationale for the investigation being reported                                                                                                                                                                                                                                                                                                                                                                                   | 4-5     |
| Objectives                   | 3       | State specific objectives, including any prespecified hypotheses                                                                                                                                                                                                                                                                                                                                                                                                       | 5       |
| <b>Methods</b>               |         |                                                                                                                                                                                                                                                                                                                                                                                                                                                                        |         |
| Study design                 | 4       | Present key elements of study design early in the paper                                                                                                                                                                                                                                                                                                                                                                                                                | 5       |
| Setting                      | 5       | Describe the setting, locations, and relevant dates, including periods of recruitment, exposure, follow-up, and data collection                                                                                                                                                                                                                                                                                                                                        | 5-6     |
| Participants                 | 6       | (a) <i>Cohort study</i> —Give the eligibility criteria, and the sources and methods of selection of participants. Describe methods of follow-up<br><i>Case-control study</i> —Give the eligibility criteria, and the sources and methods of case ascertainment and control selection. Give the rationale for the choice of cases and controls<br><i>Cross-sectional study</i> —Give the eligibility criteria, and the sources and methods of selection of participants | 5-6     |
|                              |         | (b) <i>Cohort study</i> —For matched studies, give matching criteria and number of exposed and unexposed<br><i>Case-control study</i> —For matched studies, give matching criteria and the number of controls per case                                                                                                                                                                                                                                                 | 5-6     |
| Variables                    | 7       | Clearly define all outcomes, exposures, predictors, potential confounders, and effect modifiers. Give diagnostic criteria, if applicable                                                                                                                                                                                                                                                                                                                               | 6-7     |
| Data sources/<br>measurement | 8*      | For each variable of interest, give sources of data and details of methods of assessment (measurement). Describe comparability of assessment methods if there is more than one group                                                                                                                                                                                                                                                                                   | 6-9     |
| Bias                         | 9       | Describe any efforts to address potential sources of bias                                                                                                                                                                                                                                                                                                                                                                                                              | 5-6     |
| Study size                   | 10      | Explain how the study size was arrived at                                                                                                                                                                                                                                                                                                                                                                                                                              | 5-6     |
| Quantitative variables       | 11      | Explain how quantitative variables were handled in the analyses. If applicable, describe which groupings were chosen and why                                                                                                                                                                                                                                                                                                                                           | 6-9     |
| Statistical methods          | 12      | (a) Describe all statistical methods, including those used to control for confounding                                                                                                                                                                                                                                                                                                                                                                                  | 6-9     |
|                              |         | (b) Describe any methods used to examine subgroups and interactions                                                                                                                                                                                                                                                                                                                                                                                                    | 6-9     |
|                              |         | (c) Explain how missing data were addressed                                                                                                                                                                                                                                                                                                                                                                                                                            | 6-9     |
|                              | 6       | (d) <i>Cohort study</i> —If applicable, explain how loss to follow-up was addressed<br><i>Case-control study</i> —If applicable, explain how matching of cases and controls was addressed<br><i>Cross-sectional study</i> —If applicable, describe analytical methods taking account of sampling strategy                                                                                                                                                              |         |
|                              |         | (e) Describe any sensitivity analyses                                                                                                                                                                                                                                                                                                                                                                                                                                  | 9       |

Continued on next page



1  
2  
3  
4  
5  
6  
7  
8  
9  
10  
11  
12  
13  
14  
15  
16  
17  
18  
19  
20  
21  
22  
23  
24  
25  
26  
27  
28  
29  
30  
31  
32  
33  
34  
35  
36  
37  
38  
39  
40  
41  
42  
43  
44  
45  
46  
47  
48  
49  
50  
51  
52  
53  
54  
55  
56  
57  
58  
59  
60

| <b>Results</b>           |     |                                                                                                                                                                                                              |       |
|--------------------------|-----|--------------------------------------------------------------------------------------------------------------------------------------------------------------------------------------------------------------|-------|
| Participants             | 13* | (a) Report numbers of individuals at each stage of study—eg numbers potentially eligible, examined for eligibility, confirmed eligible, included in the study, completing follow-up, and analysed            | 5-6   |
|                          |     | (b) Give reasons for non-participation at each stage                                                                                                                                                         |       |
|                          |     | (c) Consider use of a flow diagram                                                                                                                                                                           |       |
| Descriptive data         | 14* | (a) Give characteristics of study participants (eg demographic, clinical, social) and information on exposures and potential confounders                                                                     | 10    |
|                          |     | (b) Indicate number of participants with missing data for each variable of interest                                                                                                                          |       |
|                          |     | (c) <i>Cohort study</i> —Summarise follow-up time (eg, average and total amount)                                                                                                                             |       |
| Outcome data             | 15* | <i>Cohort study</i> —Report numbers of outcome events or summary measures over time                                                                                                                          | 6     |
|                          |     | <i>Case-control study</i> —Report numbers in each exposure category, or summary measures of exposure                                                                                                         |       |
|                          |     | <i>Cross-sectional study</i> —Report numbers of outcome events or summary measures                                                                                                                           |       |
| Main results             | 16  | (a) Give unadjusted estimates and, if applicable, confounder-adjusted estimates and their precision (eg, 95% confidence interval). Make clear which confounders were adjusted for and why they were included | 10-12 |
|                          |     | (b) Report category boundaries when continuous variables were categorized                                                                                                                                    |       |
|                          |     | (c) If relevant, consider translating estimates of relative risk into absolute risk for a meaningful time period                                                                                             |       |
| Other analyses           | 17  | Report other analyses done—eg analyses of subgroups and interactions, and sensitivity analyses                                                                                                               | 11-12 |
| <b>Discussion</b>        |     |                                                                                                                                                                                                              |       |
| Key results              | 18  | Summarise key results with reference to study objectives                                                                                                                                                     | 12-14 |
| Limitations              | 19  | Discuss limitations of the study, taking into account sources of potential bias or imprecision. Discuss both direction and magnitude of any potential bias                                                   | 14    |
| Interpretation           | 20  | Give a cautious overall interpretation of results considering objectives, limitations, multiplicity of analyses, results from similar studies, and other relevant evidence                                   | 14    |
| Generalisability         | 21  | Discuss the generalisability (external validity) of the study results                                                                                                                                        | 12-13 |
| <b>Other information</b> |     |                                                                                                                                                                                                              |       |
| Funding                  | 22  | Give the source of funding and the role of the funders for the present study and, if applicable, for the original study on which the present article is based                                                | 15    |

\*Give information separately for cases and controls in case-control studies and, if applicable, for exposed and unexposed groups in cohort and cross-sectional studies.

**Note:** An Explanation and Elaboration article discusses each checklist item and gives methodological background and published examples of transparent reporting. The STROBE checklist is best used in conjunction with this article (freely available on the Web sites of PLoS Medicine at <http://www.plosmedicine.org/>, Annals of Internal Medicine at <http://www.annals.org/>, and Epidemiology at <http://www.epidem.com/>). Information on the STROBE Initiative is available at [www.strobe-statement.org](http://www.strobe-statement.org).

# BMJ Open

## Community social support and onset of dementia in older Japanese individuals: A multilevel analysis using the JAGES cohort data

|                                 |                                                                                                                                                                                                                                                                                                                                                                                                                                                                                                                                                                                                                                                                                                                                                                                                                                                                        |
|---------------------------------|------------------------------------------------------------------------------------------------------------------------------------------------------------------------------------------------------------------------------------------------------------------------------------------------------------------------------------------------------------------------------------------------------------------------------------------------------------------------------------------------------------------------------------------------------------------------------------------------------------------------------------------------------------------------------------------------------------------------------------------------------------------------------------------------------------------------------------------------------------------------|
| Journal:                        | <i>BMJ Open</i>                                                                                                                                                                                                                                                                                                                                                                                                                                                                                                                                                                                                                                                                                                                                                                                                                                                        |
| Manuscript ID                   | bmjopen-2020-044631.R1                                                                                                                                                                                                                                                                                                                                                                                                                                                                                                                                                                                                                                                                                                                                                                                                                                                 |
| Article Type:                   | Original research                                                                                                                                                                                                                                                                                                                                                                                                                                                                                                                                                                                                                                                                                                                                                                                                                                                      |
| Date Submitted by the Author:   | 28-Feb-2021                                                                                                                                                                                                                                                                                                                                                                                                                                                                                                                                                                                                                                                                                                                                                                                                                                                            |
| Complete List of Authors:       | Miyaguni, Yasuhiro; National Center for Geriatrics and Gerontology, Department of Gerontological Evaluation, Center for Gerontology and Social Science<br>Tabuchi, Takahiro; Osaka International Cancer Institute, Cancer Control Center<br>Aida, Jun; Tohoku University Graduate School of Dentistry School of Dentistry, Department of International and Community Oral Health<br>Saito, Masashige; Nihon Fukushi University, Department of Social Welfare<br>Tsuji, Taishi; University of Tsukuba Faculty of Health and Sport Sciences<br>Sasaki, Yuri; National Institute of Public Health, Department of International Health and Collaboration<br>Kondo, Katsunori; National Center for Geriatrics and Gerontology, Department of Gerontological Evaluation, Center for Gerontology and Social Science; Chiba University, Center for Preventive Medical Sciences |
| <b>Primary Subject Heading</b>: | Epidemiology                                                                                                                                                                                                                                                                                                                                                                                                                                                                                                                                                                                                                                                                                                                                                                                                                                                           |
| Secondary Subject Heading:      | Epidemiology                                                                                                                                                                                                                                                                                                                                                                                                                                                                                                                                                                                                                                                                                                                                                                                                                                                           |
| Keywords:                       | Dementia < NEUROLOGY, EPIDEMIOLOGY, SOCIAL MEDICINE                                                                                                                                                                                                                                                                                                                                                                                                                                                                                                                                                                                                                                                                                                                                                                                                                    |
|                                 |                                                                                                                                                                                                                                                                                                                                                                                                                                                                                                                                                                                                                                                                                                                                                                                                                                                                        |

SCHOLARONE™  
Manuscripts



I, the Submitting Author has the right to grant and does grant on behalf of all authors of the Work (as defined in the below author licence), an exclusive licence and/or a non-exclusive licence for contributions from authors who are: i) UK Crown employees; ii) where BMJ has agreed a CC-BY licence shall apply, and/or iii) in accordance with the terms applicable for US Federal Government officers or employees acting as part of their official duties; on a worldwide, perpetual, irrevocable, royalty-free basis to BMJ Publishing Group Ltd ("BMJ") its licensees and where the relevant Journal is co-owned by BMJ to the co-owners of the Journal, to publish the Work in this journal and any other BMJ products and to exploit all rights, as set out in our [licence](#).

The Submitting Author accepts and understands that any supply made under these terms is made by BMJ to the Submitting Author unless you are acting as an employee on behalf of your employer or a postgraduate student of an affiliated institution which is paying any applicable article publishing charge ("APC") for Open Access articles. Where the Submitting Author wishes to make the Work available on an Open Access basis (and intends to pay the relevant APC), the terms of reuse of such Open Access shall be governed by a Creative Commons licence – details of these licences and which [Creative Commons](#) licence will apply to this Work are set out in our licence referred to above.

Other than as permitted in any relevant BMJ Author's Self Archiving Policies, I confirm this Work has not been accepted for publication elsewhere, is not being considered for publication elsewhere and does not duplicate material already published. I confirm all authors consent to publication of this Work and authorise the granting of this licence.

1  
2  
3 1 **Community social support and onset of dementia in older Japanese individuals: A**  
4  
5 2 **multilevel analysis using the JAGES cohort data**  
6  
7  
8 3

9  
10 4 Yasuhiro Miyaguni<sup>1\*</sup>, Takahiro Tabuchi<sup>2</sup>, Jun Aida<sup>3</sup>, Masashige Saito<sup>4</sup>, Taishi Tsuji<sup>5</sup>, Yuri  
11  
12 5 Sasaki<sup>6</sup>, Katsunori Kondo<sup>1,7</sup>  
13  
14 6

15  
16  
17 7 <sup>1</sup>Department of Gerontological Evaluation, Center for Gerontology and Social Science,  
18  
19 8 National Center for Geriatrics and Gerontology, Aichi, Japan

20  
21 9 <sup>2</sup>Cancer Control Center, Osaka International Cancer Institute, Osaka, Japan

22  
23  
24 10 <sup>3</sup>Department of International and Community Oral Health, Tohoku University Graduate  
25  
26 11 School of Dentistry, Miyagi, Japan

27  
28 12 <sup>4</sup>Department of Social Welfare, Nihon Fukushi University, Aichi, Japan

29  
30 13 <sup>5</sup>Faculty of Health and Sport Sciences, University of Tsukuba, Tokyo, Japan

31  
32  
33 14 <sup>6</sup>Department of International Health and Collaboration, National Institute of Public Health,  
34  
35 15 Saitama, Japan

36  
37 16 <sup>7</sup>Center for Preventive Medical Sciences, Chiba University, Chiba, Japan  
38  
39  
40 17

41  
42 18 **\*Correspondence to:** Yasuhiro Miyaguni, PhD

43  
44 19 Department of Gerontological Evaluation, Center for Gerontology and Social Science,

45  
46 20 National Center for Geriatrics and Gerontology, Aichi 474-8511, Japan

47  
48 21 Tel: +81-562-46-2311

49  
50 22 Email: yasuhiro@miyaguni.net  
51  
52  
53 23

54  
55  
56 24 **Word count:** 3401 words  
57  
58  
59  
60

1  
2  
3 **1 ABSTRACT**  
4

5 **2 Objective:** Recently, there has been an increase in the number of people with dementia.  
6

7  
8 **3** However, no study has examined the association between community-level social support  
9  
10 **4** and the onset of incident dementia using multilevel survival analysis.  
11

12 **5 Design:** A prospective cohort study.  
13

14 **6 Participants and setting:** We analyzed data pertaining to 15,313 community-dwelling adults  
15  
16 **7** aged 65 years or older (7,381 men, 7,932 women) who had not accessed long-term care  
17  
18 **8** insurance and were living in Aichi Prefecture (seven municipalities) in Japan.  
19

20 **9 Primary and secondary outcome measures:** The association between community-level  
21  
22 **10** social support and onset of incident dementia was examined using the Japan Gerontological  
23  
24 **11** Evaluation Study, a prospective cohort study introduced in Japan in 2003. Incident dementia  
25  
26 **12** was assessed using Long-term Care Insurance records spanning 3,436 days from the baseline  
27  
28 **13** survey.  
29  
30

31  
32 **14 Results:** During the 10-year follow-up, the onset of incident dementia occurred in 1,776  
33  
34 **15** adults. Among older people, a 1% increase in community-level social support (in the form of  
35  
36 **16** receiving emotional support) was associated with an approximately 4% reduction in the risk  
37  
38 **17** of developing dementia, regardless of socio-demographic variables and health conditions  
39  
40 **18** (HR = 0.96; 95% CI = 0.94-0.99).  
41  
42

43  
44 **19 Conclusions:** Receiving community-level social support in the form of emotional support is  
45  
46 **20** associated with a lower risk of developing incident dementia.  
47  
48

49  
50 **21**

51 **22 Keywords:** Cognitive decline, Population health, Social epidemiology  
52  
53

54 **23**

55  
56 **24**

57  
58 **25**  
59  
60



## 1 INTRODUCTION

2 Dementia constitutes a pressing health challenge, especially among the older population. The  
3 incidence of dementia worldwide is projected to rise to 66 and 131 million by 2030 and 2050,  
4 respectively.[1] In Japan alone, it is predicted that there will be 4.62 and 7 million people  
5 affected by 2012 and 2025, respectively. These rates suggest that about one in seven Japanese  
6 people aged 65 years or above may develop dementia.[2]

7 Currently, no effective therapeutic intervention for dementia has been determined. As  
8 such, identifying adjustable risks and preventive measures is essential for slowing down or  
9 preventing the onset of dementia.[3] Previous studies have identified genetic, vascular, and  
10 lifestyle-related factors,[4-9] such as advanced age, being female, having a low education  
11 level, being in poor health, smoking, and heavy drinking, as being associated with a higher  
12 risk of developing dementia. An additional significantly adjustable risk factor is the lack of  
13 positive social networks and influences. A previous study suggested that engagement in  
14 social activities, and having a rich network of activities within close relationships, confers  
15 some protection against dementia among older people.[4]

16 The definition and the attendant use of the notion of social relationships vary among  
17 researchers. The concept may encompass factors such as social participation, social networks,  
18 and social support. Social support can be defined as aid and assistance exchanged through  
19 social relationships and interpersonal transactions [10], and it might be a significant  
20 protective factor for cognitive aging.[11] A previous systematic review paper indicated that  
21 people with social support had 50% lower mortality than those without it.[12] Social support  
22 has been categorized into four types—giving and receiving support at an emotional level and  
23 at an instrumental level[13]—all of which occur at an individual level and have been  
24 associated with improved health. For example, providing emotional and instrumental social  
25 support to non-family members leads to fewer depressive symptoms.[13] Providing

1  
2  
3 1 emotional support to the spouse, and instrumental support to relatives, friends, and neighbors,  
4  
5 2 further lowers the risk of mortality.[14] Receiving emotional support is associated with  
6  
7 3 improved cognitive function.[11] In addition, diverse social relationships, including social  
8  
9 4 support from family members, are associated with a lower incidence of dementia.[15]

10  
11  
12 5 Besides individual-level social factors, social networks and relationships at the  
13  
14 6 community level have been investigated to understand its association with moderating the  
15  
16 7 risk of functional disability. Such studies investigate “social capital,” which has been defined  
17  
18 8 as the “resources that are accessed by individuals as a result of their membership of a network  
19  
20 9 or a group.”[16] A previous study found that lower social capital at the community-level is  
21  
22 10 associated with an increased rate of functional disability among older women.[17] Moreover,  
23  
24 11 there are reports of research on community social capital and cognitive decline.[18] However,  
25  
26 12 because these studies are cross-sectional ones, longitudinal studies are needed. Nevertheless,  
27  
28 13 no study has examined how community-level social support influences the risk of dementia.  
29  
30 14 Therefore, this study seeks to evaluate the relationship between social support at the  
31  
32 15 community level and the onset of dementia.  
33  
34  
35  
36  
37  
38  
39

## 40 **METHODS**

### 41 **Sample**

42  
43  
44 19 Data for this study were accessed via the Japan Gerontological Evaluation Study (JAGES).  
45  
46 20 Set up in Aichi in 2003, this was a prospective cohort study of the Center for Well-being and  
47  
48 21 Society of the Nihon Fukushi University.[19] The research was carried out in seven—three  
49  
50 22 larger (Handa, Tokoname, and Chita Hokubu) and four smaller (Agui, Mihama, Minamichita,  
51  
52 23 and Taketoyo)— municipalities that encompass the entire southern region of the Chita  
53  
54 24 peninsula and the Aichi Prefecture. In October 2003, an estimated 276,208 people resided in  
55  
56 25 these locations where 18.0% were aged 65 years or above.[17] On average, the data of 6,300  
57  
58  
59  
60



1 residents in the 44 school districts were analyzed in this study. From the three larger  
2 municipalities, 5,000 survey candidates were randomly selected from the list of persons  
3 insured by long-term care insurance who were not certified as requiring long-term care. In the  
4 four smaller municipalities, candidates were randomly selected from those not receiving  
5 public long-term care insurance benefits due to a physical or cognitive disability. Of the  
6 33,152 people selected, 15,313 individuals answered the baseline survey (response rate =  
7 52.1%).<sup>[15]</sup> The exclusion criteria were: a) people who had difficulty in performing activities  
8 of daily living as a result of disabilities; b) people who did not provide baseline information  
9 ( $n=579$ ); c) people who did not provide social support information ( $n = 1359$ ); and d) people  
10 who did not provide a school district code ( $n = 2,343$ ). Ultimately, 11,032 subjects (5,627  
11 women and 5,405 men) were included in this analysis.

12 The ethics committee of Research of Human Subjects at the Nihon Fukushi  
13 University evaluated and approved the use of the JAGES protocol (approval number 13-14).  
14 Consent to participate in the study was indicated by a written explanation at the beginning of  
15 the questionnaire and by the response received on the questionnaire.

### 17 **Follow-up**

18 The evaluation parameters of the JAGES Project included health status, functional  
19 deterioration, and mental impairment amongst older Japanese people who were not  
20 institutionalized. In Japan, there is a long-term care insurance system that covers both  
21 institutional and community-based caregiving. Individuals aged 65 years or above qualify to  
22 receive benefits on the strict basis of physical and cognitive disability. The follow-up began  
23 on November 1, 2003. Dementia-associated data from the six municipalities (specifically in  
24 terms of the onset) was assessed until March 28, 2013.

25

## 1 Outcome variables

2 Dementia was graded on a scale that includes categories from I to IV, and M based on the  
3 Activities of Daily Living Independence Assessment Criteria for Older Individuals with  
4 Dementia. The Degree of Autonomy in the Daily Lives of Older Individuals with Dementia  
5 Scale, created by the Ministry of Health, Labor, and Welfare of Japan, evaluates an  
6 individual's ability to carry out daily tasks associated with living on a scale that includes  
7 categories from I to IV and M (Supplementary Table S1, view as supplementary data online).

8 This scale was validated based on its high association with the Mini-Mental State  
9 Evaluation.[20] It has been reported that dementia symptoms indices are strongly correlated  
10 with Mini Mental State Examination. (Spearman's rank correlation  $\rho = -0.73$ ,  $P < 0.001$ ).  
11 Scores I, II, III, and IV on the dementia scale are equivalent to 22, 16, 13, and 6 points on the  
12 Mini-Mental State Examination, respectively.[20] A score of I indicates that the patient  
13 suffers from some level of cognitive decline but remains able to perform domestic and social  
14 tasks nearly independently. A score of II indicates that the patient has certain symptoms or  
15 behaviors indicative of cognitive impairment and challenges in communication that may  
16 hamper the performance of daily tasks, although some amount of external assistance is  
17 needed to facilitate routine function. A score of III indicates that the patient periodically  
18 exhibits symptoms indicating communication challenges or symptoms/behaviors, which may  
19 interfere with the performance of daily tasks, necessitating external assistance. A score of IV  
20 indicates that the patient usually shows communication or behavioral challenges, which  
21 hampers performing daily tasks, necessitating frequent care. Finally, a score of M  
22 (M=Medical, requires specialized medical care) is used when the patient shows significant  
23 cognitive impairment, displays difficult behavior, or has a serious physical illness, requiring  
24 expert medical intervention. Symptoms and behaviors seen in the M rank include delirium,

1  
2  
3 1 paranoia, agitation, self-injury and harm, and other psychiatric symptoms, as well as ongoing  
4  
5 2 problem behaviors caused by psychiatric symptoms.  
6  
7  
8 3

9  
10 4 **Explanatory variables**

11  
12 5 An aggregate of individual-level background data was acquired for the 44 school-based  
13  
14 6 districts to evaluate community social support. An aggregate of responses for individual-level  
15  
16 7 social support among the school districts was used as an indicator of community social  
17  
18 8 support. Within the Japanese context, school districts (or primary schools) are primary  
19  
20 9 residential units of individuals within rural zones. Generally, school districts comprise  
21  
22 10 geographical settings where older individuals may readily travel via foot or bicycle.[21]  
23  
24 11 Individual-level social support was assessed based on four dimensions of the Two-Way  
25  
26 12 Social Support Scale.[13] The four types of support included: (a) receiving support at the  
27  
28 13 emotional level, (b) providing support at the emotional level, (c) receiving support at the  
29  
30 14 instrumental level, and (d) providing support at the instrumental level (Supplementary Table  
31  
32 15 S2, view as supplementary data online).  
33  
34  
35  
36

37  
38 16 A single item measured each support, “If you or others required additional daily  
39  
40 17 assistance, who would you depend upon to assist or to be assisted by?” Receiving emotional  
41  
42 18 support was conceptualized as the perception of the respondent’s complaints or fears by an  
43  
44 19 individual (e.g., “Do you have someone who listens to your concerns and complaints? Circle  
45  
46 20 all that apply. Options included family living together, separated children and relatives,  
47  
48 21 acquaintance/friends/neighbors”). Providing emotional support was conceptualized as the  
49  
50 22 expression of complaints or fears by an individual to the respondents (e.g., “Do you listen to  
51  
52 23 someone’s concerns or complaints? Circle the numbers of all the answers that apply. Options  
53  
54 24 include family living together, separated children and relatives, acquaintances/friends/  
55  
56 25 neighbors”). Receiving instrumental support was conceived as the rendering of care to the  
57  
58  
59  
60

1 respondent by an individual, if the respondent were ill for many days (e.g., “Do you have  
2 someone who looks after you when you are sick and confined to bed for a few days? Circle  
3 the numbers of all the answers that apply. Options include family living together, separated  
4 children and relatives, acquaintance/friends/neighbors”). Providing instrumental support was  
5 defined as nursing of an individual by the respondent if they were ill for many days (e.g., “Do  
6 you look after someone when he/she is sick and confined to bed for a few days? Circle the  
7 numbers of all the answers that apply. Options include family living together, separated  
8 children and relatives, acquaintance/friends/neighbors”).

9 The percentage of people who responded to each item was considered while  
10 determining the level of social support. An aggregation of the responses to the survey items,  
11 apropos the four dimensions of social support, was performed for the 44 local districts and  
12 further, considered community social support indicators.

### 14 **Covariates**

15 Other explanatory variables included: gender (female, male), age (65–69, 70–74, 75–79, 80–  
16 84, and 85 years or older), living conditions (accompanied/unaccompanied), marital status  
17 (married, never married, divorced, widowed, other/missing), education ( $\geq 13$  years, 10–12  
18 years, 6–9 years, <6 years, other/missing), present illness (no, yes, missing), depressive  
19 symptoms evaluated by the GDS-15 (Geriatric Depression Scale: no depression 0–4 points,  
20 mild depression 5–9 points, depression 10–15 points, missing), smoking status (never,  
21 former, current, missing), alcohol consumption (no, do not drink every day, drink every day  
22  $\leq 35$  g/day, drink every day  $> 35$  g/day, missing), and individual social support.

### 24 **Statistical analysis**

1 This prospective study employed multilevel survival analysis. The data of 11,032 people  
2 living in 44 local districts were used in this study. The multilevel analysis framework relied  
3 on the assumption that the health outcome of individuals is partially affected by the district in  
4 which they live. The multilevel model evaluated the change in outcome across districts  
5 (random effects) and the influences of community-level factors on the outcome, accounting  
6 for specific constituent features (fixed effects). Multilevel survival analysis was employed to  
7 compute the hazard ratio (HR) and 95% confidence interval (CI) for the onset of dementia at  
8 follow-up. The HR of the social support variable was determined as the 1% variation in the  
9 proportion of aggregated social support. For the analyses, all four social support indicators at  
10 the community level and social-demographic factors were concurrently adjusted.  
11 Furthermore, three sensitivity analyses were conducted, excluding (i) one year, (ii) two years,  
12 and (iii) three years after baseline. The STATA SE version 13 (Stata Corp., College Station,  
13 TX, USA) was used for the analysis, and the “stmixed” command was used (the “mestreg”  
14 command has become a standard feature in STATA 14).

## 16 **Patient and public involvement**

17 The patients and public were not involved in the design, conduct, reporting, or dissemination  
18 plans of our research.

## 20 **RESULTS**

21 During the 9.4-year follow-up period (87,232 person-years), dementia onset was observed in  
22 1,776 individuals (16.1%). Supplementary Table S3 (view as supplementary data online)  
23 shows the baseline characteristics and incidence rate of dementia per 1,000 person-years. The  
24 incidence rate of dementia was higher in those who were female, older, living alone,  
25 widowed or divorced, those having less than 6 years of education with an existing illness and

1 with a higher score on GDS-15. It was also higher for those who did not consume alcohol,  
 2 did not get support at the emotional level, did not offer support at the emotional level, and did  
 3 not receive help at the instrumental level, compared with each counterpart category.

4 Table 1 shows the mean, range, median, correlation matrix, and SD of the  
 5 community-level social support indicators in the 44 districts. Spearman's correlation  
 6 coefficients ranged from -.11 to .44. The average proportion of people receiving community  
 7 level emotional support was 89.9%, with a range of 82.7% to 93.5%. The proportion of  
 8 people receiving community level emotional support was moderately correlated with the  
 9 proportion of people receiving instrumental support ( $\rho = .44$ ).

10  
 11 **Table 1** Characteristics and Spearman's correlation coefficient matrices for community level  
 12 social support indicators ( $N = 44$  school districts)

|                                                   | Mean | SD  | Min  | Max  | Spearman's Rank Correlation Coefficient |      |      |
|---------------------------------------------------|------|-----|------|------|-----------------------------------------|------|------|
|                                                   |      |     |      |      | 1                                       | 2    | 3    |
| 1. Community level receiving emotional support    | 89.9 | 2.0 | 82.7 | 93.5 | --                                      |      |      |
| 2. Community level providing emotional support    | 83.1 | 2.2 | 76.1 | 88.6 | -.11*                                   | --   |      |
| 3. Community level receiving instrumental support | 94.0 | 1.6 | 91.3 | 97.6 | .44*                                    | .08* | --   |
| 4. Community level providing instrumental support | 91.9 | 2.1 | 85.6 | 97.9 | -.01                                    | .41* | .26* |

13 *SD*, standard deviation; Min, minimum; Max, maximum; \*  $p < .05$

14 The results of the multilevel survival analyses (Model 1) for the onset of incident  
 15 dementia with three sensitivity analyses models (Model 2, 3, and 4) are shown in Table 2 and  
 16 Supplementary Table S4

17  
 18 **Table 2** Results of multilevel survival analyses for onset of incident dementia

|  | Model 1 | Model 2 (1 year) |
|--|---------|------------------|
|--|---------|------------------|

|                                         | n = 11,032       | n=10,780         |
|-----------------------------------------|------------------|------------------|
| <i>Fixed effect</i>                     | HR (95%CI)       | HR (95%CI)       |
| <i>Community level variables</i>        |                  |                  |
| Rate of receiving emotional support*    | 0.96 (0.94-0.99) | 0.97 (0.94-0.99) |
| Rate of providing emotional support*    | 0.99 (0.96-1.01) | 0.99 (0.96-1.01) |
| Rate of receiving instrumental support* | 1.01 (0.97-1.04) | 1.01 (0.97-1.04) |
| Rate of providing instrumental support* | 1.00 (0.97-1.03) | 1.00 (0.97-1.02) |
| <i>Random effects</i>                   |                  |                  |
| Community level variance (SE)           | 0.06 (0.05)      | 0.04 (0.06)      |

\*HR for one-point increment of community social support (range: 0-100)

HR adjusted for sex, age, living alone, marital status, education, present illness, GDS, smoking status, alcohol consumption, receiving emotional support, providing emotional support, receiving instrumental support, and providing instrumental support. (The full version, including individual-level results, is shown in Table S4).

Regarding community-level social support, in Model 1, a significant association was observed between the onset of incident dementia and the proportion of people receiving community level emotional support (HR=0.96; 95% CI=0.94-0.99). On the contrary, significant correlations or relationship between the onset of incident dementia and other community-level social support were absent. In Model 2 of a sensitivity analysis (excluding 1 year after baseline), significant correlations between the onset of incident dementia and receiving community-level emotional support (HR=0.97; 95% CI=0.94-0.99) remained. Model 3 (excluding 2 years after baseline) and Model 4 (excluding 3 years after baseline) showed similar results to Models 1 and 2 (Supplementary Table S4). Regarding individual-level social support, in Model 1, the incidence of dementia was significantly associated with receiving individual-level emotional support (HR=0.83; 95% CI=0.73-0.94) as well as providing individual-level instrumental support (HR=0.76; 95% CI=0.66-0.89).

## DISCUSSION

To our knowledge, this is the first study to evaluate community-level social support using multilevel survival analysis to investigate the onset of dementia in a large sample of older

1 community-dwelling individuals. There was a prospective association between living in a  
2 community with a higher level of social support and a lower occurrence of dementia during  
3 the 10-year study period. However, only one of the community-level social support indicators  
4 was significantly associated with dementia onset. The outcome of this research may have  
5 significant implications for public health, i.e., by suggesting potential practical implications  
6 useful for policymakers, family members, and medical staff. Because previous intervention  
7 research indicated that promoting community through salon activity increased social support  
8 in the community [22], providing such activities may be a practical solution to prevent the  
9 onset of dementia. Among older people, a 1% rise in receiving community-level emotional  
10 support correlated with an approximately 4% decrease in the incidence of dementia,  
11 irrespective of socio-demographic factors and health circumstances.

12 For individual-level social support, providing social support was significantly  
13 correlated with a lower risk for dementia. A previous study indicated that providing  
14 emotional and instrumental support at the individual level might be a risk factor for the onset  
15 of depression.[13] A previous study by Murata and colleagues [23] examined the association  
16 between individual-level social support and dementia development in a 10-year cohort. The  
17 results showed that receipt of support from friends and neighbors was associated with a lower  
18 risk of developing dementia for both men and women. Nonetheless, people who were  
19 providing social support might be less likely to develop dementia.

20 In the present study, among the four kinds of community social support, only  
21 community-level emotional support affected the onset of incident dementia, even after  
22 adjustment for individual-level social support. Two reasons might contribute to this finding.  
23 First, a community where people receive high emotional support from each other might be a  
24 place where older people are less likely to feel lonely. Indeed, loneliness was found to predict  
25 dementia in a previous study.[24] Second, because depression was a risk factor for



1  
2  
3 1 developing dementia [25], abundant community-level emotional support may mitigate the  
4  
5 2 risk of depression, thereby decreasing the incidence of dementia. [26] In the current study,  
6  
7 3 social support from children was evaluated through three questions: “To what extent do they  
8  
9 4 actually comprehend your feelings about things?” “How much can you depend on them if  
10  
11 5 you experience a critical problem?” and “How much can you open up to them if you need to  
12  
13 6 talk about your fears?” A place where many people receive emotional support may be a place  
14  
15 7 where people generally have good interpersonal relationships. Therefore, a community-level  
16  
17 8 indicator of receiving emotional support may be associated with the onset of dementia.

21 9 Community social support may be an element of social capital or community-level  
22  
23 10 social relationships. For this reason, several plausible pathways between receiving  
24  
25 11 community level emotional support and onset of incident dementia were found in the current  
26  
27 12 study. First, community-level social support may influence people’s health by shaping health-  
28  
29 13 associated behaviors. This may be done through faster dissemination of health-related  
30  
31 14 information or by increasing the probability of people taking up healthy standards of behavior  
32  
33 15 and moderating behaviors that have negative effects on health. Second, social support may  
34  
35 16 shape health by enhancing the accessibility of local services and facilities. Social  
36  
37 17 involvement of older people may be fostered by accessing services, including transportation,  
38  
39 18 recreational spaces, and community hubs may foster, thus, restricting or arresting the  
40  
41 19 development of dementia. Third, community social support has the potential to foster good  
42  
43 20 cognitive health by minimizing psychological distress. Fourth, places with higher social  
44  
45 21 support at the community level generate greater egalitarian political involvement trends. This  
46  
47 22 may lead to the execution of policies that ensure the safety of community members. In  
48  
49 23 addition, according to a systematic review of social capital including studies mainly  
50  
51 24 conducted in western countries, most of the intervention studies in the last two decades have  
52  
53 25 focused on individual-level changes, with a dearth of studies examining community-level  
54  
55  
56  
57  
58  
59  
60

1 changes.[27] Furthermore, there are few longitudinal studies, even observational studies, that  
2 have produced dementia outcomes. Therefore, the results of this study can contribute to the  
3 social capital research agenda for developing intervention research at the community level.

4 It is critical to mention the possible limitations associated with the present study.

5 First, the response rate to the survey (52.1%) could affect the generalizability of the results.

6 However, this response rate was higher than the census conducted by the government (41.8%

7 response rate in the postal survey 2020).[28] Second, the dementia outcome is a nationally

8 standardized scale used by public long-term care insurance, but it is not a clinical diagnosis.

9 Third, there was no information about the type of dementia diagnoses (for instance,

10 Alzheimer's disease, cerebrovascular dementia, or dementia with Lewy bodies). Fourth, the

11 sample did not fully reflect the older population in Japan because the study subjects were

12 recruited from a single prefecture. Therefore, the findings cannot be generalized to urban

13 areas or places where the population has distinct characteristics. Finally, other community-

14 level social relationships, including social capital, were not evaluated. However, we plan to

15 assess a wider range of community-level factors in subsequent studies.

16

## 17 **CONCLUSIONS**

18 The results of this study showed that a higher level of social support at the community level

19 is related to a lower incidence of dementia after adjusting for individual-level social support

20 among older individuals. A community level social support indicator (an aggregated value of

21 receiving emotional support) showed a significant association with dementia onset. The

22 present prospective study suggests that receiving emotional support at the community level

23 may result in a lower level of incident dementia among community-dwelling older

24 individuals in Japan.

25

## 1 **Acknowledgements**

2 Editorial support in the form of medical writing was obtained from Editage.  
3

## 4 **Competing Interests**

5 None of the authors have a conflict of interest to declare.  
6

## 7 **Funding**

8 This study used data from the Japan Gerontological Evaluation Study (JAGES), which was  
9 supported by the Ministry of Education, Culture, Sports, Science and Technology-Japan  
10 (MEXT)-Supported Program for the Strategic Research Foundation at Private Universities  
11 (grant number 2009-2013), Japan Society for the Promotion of Science (JSPS) KAKENHI  
12 (grant numbers JP18390200, JP22330172, JP22390400, JP23243070, JP23590786,  
13 JP23790710, JP24390469, JP24530698, JP24683018, JP25253052, JP25870573,  
14 JP25870881, JP26285138, JP26882010, JP15H01972, and 17K15822), Health Labour  
15 Sciences Research Grants (grant numbers H22-Choju-Shitei-008, H24-Junkanki [Seishu]  
16 Ippan-007, H24-Chikyukibo-Ippan-009, H24-Choju-Wakate-009, H25-Kenki-Wakate-015,  
17 H25-Choju-Ippan-003, H26-Irryo-Shitei-003 [Fukkou], H26-Choju-Ippan-006, H27-  
18 Ninchisyou-Ippan-001, H28-choju-Ippan-002, H28Ninchisyou-Ippan-002, H30-Kenki-Ippan-  
19 006, and H30-Junkankitou-Ippan-004), Japan Agency for Medical Research and development  
20 (AMED) (grant numbers JP17dk0110017, JP18dk0110027, JP18ls0110002, and  
21 JP18le0110009), and the Research Funding for Longevity Sciences from National Center for  
22 Geriatrics and Gerontology (grant numbers 24-17, 24-23, 29-42, and 30-22). The views and  
23 opinions expressed in this article are those of the authors and do not necessarily reflect the  
24 official policy or position of the respective funding organizations.  
25

1  
2  
3 **1 Author contributions**  
4

5 2 YM conceived the research idea, participated in the study design, performed statistical  
6  
7 3 analysis, and prepared the manuscript as the primary author. Tabuchi T developed the  
8  
9 4 research idea, participated in the study design, cooperated in the statistical analysis, and  
10  
11 5 revised the manuscript. JA and MS assisted in the data analysis and reviewed the manuscript.  
12  
13 6 Tsuji T and YS acquired data, collaborated in statistical analysis, and revised the manuscript.  
14  
15 7 As the lead researcher of the JAGES project, KK helped to conceptualize the study. The final  
16  
17 8 manuscript was read and approved by all authors.  
18  
19  
20  
21  
22 9

23  
24 **10 Data sharing statement**  
25

26 11 Data are available upon reasonable request.  
27  
28  
29 12

30  
31 **13 Ethics Statement**  
32

33 14 This study was approved by the Nihon Fukushi University Ethics Committee (approval  
34  
35 15 number 13-14).  
36  
37  
38  
39  
40  
41  
42  
43  
44  
45  
46  
47  
48  
49  
50  
51  
52  
53  
54  
55  
56  
57  
58  
59  
60

## References

1. Prince M, Wimo A, Guerchet M, et al. *World Alzheimer Report 2015: The Global Impact of Dementia: An Analysis of Prevalence, Incidence, Cost and Trends* [online report]. London: Alzheimer's Disease International 2015.  
<https://www.alz.co.uk/research/WorldAlzheimerReport2015.pdf>
2. Ministry of Health Law, 2017. <https://www.mhlw.go.jp/content/000522832.pdf>
3. Middleton LE, Yaffe K. Promising strategies for the prevention of dementia. *Arch Neurol* 2009;66(10):1210–15. doi: 10.1001/archneurol.2009.201
4. Fratiglioni L, Paillard-Borg S, Winblad B. (2004). An active and socially integrated lifestyle in late life might protect against dementia. *Lancet Neurol* 2004;3(6):343–53. doi: 10.1016/s1474-4422(04)00767-7
5. Gao S, Hendrie HC, Hall KS, et al. The relationships between age, sex, and the incidence of dementia and Alzheimer disease: a meta-analysis. *Arch Gen Psychiatry* 1998;55(9):809–15. doi: 10.1001/archpsyc.55.9.809
6. Livingstone G, Sommerlad A, Orgeta V, et al. Dementia prevention, intervention, and care. *Lancet* 2017;390(10113):2673–734. [https://doi.org/10.1016/S0140-6736\(17\)31363-6](https://doi.org/10.1016/S0140-6736(17)31363-6)
7. Norton MC, Dew J, Smith H, et al. Lifestyle behavior pattern is associated with different levels of risk for incident dementia and Alzheimer's disease: the Cache County Study. *J Am Geriatr Soc* 2012;60(3):405–12. doi: 10.1111/j.1532-5415.2011.03860.x
8. Patterson C, Feightner JW, Garcia A, et al. Diagnosis and treatment of dementia: 1. Risk assessment and primary prevention of Alzheimer disease. *CMAJ* 2008;178(5):548–56. doi: 10.1503/cmaj.070796

- 1  
2  
3 9. Santini ZI, Koyanagi A, Tyrovolas S, et al. The association between social  
4 relationships and depression: a systematic review. *J Affect Disord* 2015;175:53–65.  
5  
6 doi: 10.1016/j.jad.2014.12.049  
7  
8
- 9  
10 10. Heany CA, Israel BA. Social networks and social support. In: Glanz K, Rimer BK,  
11 Viswanath K, eds. *Health Behavior and Health Education Theory, Research, and*  
12  
13 *Practice*. 4th ed. San Francisco, CA: Jossey-Bass; 2008:189–210.  
14  
15
- 16  
17 11. Seeman TE, Lusignolo TM, Albert M, et al. Social relationships, social support, and  
18 patterns of cognitive aging in healthy, high-functioning older adults: MacArthur  
19  
20 Studies of Successful Aging. *Health Psychol* 2001;20(4):243–55. doi: 10.1037/0278-  
21  
22 6133.20.4.243  
23  
24
- 25  
26 12. Holt-Lunstad J, Smith TB, Layton JB. Social relationships and mortality risk: a meta-  
27  
28 analytic review. *PLoS Med* 2010;7(7):e1000316. doi:10.1371/journal.pmed.1000316  
29  
30
- 31  
32 13. Tsuboi H, Hirai H, Kondo K. Giving social support to outside family may be a  
33  
34 desirable buffer against depressive symptoms in community-dwelling older adults:  
35  
36 Japan Gerontological Evaluation Study. *BioPsychoSoc Med* 2016;10(1):18. doi:  
37  
38 10.1186/s13030-016-0064-6  
39
- 40  
41 14. Brown SL, Nesse RM, Vinokur AD, Smith DM. Providing social support may be  
42  
43 more beneficial than receiving it: results from a prospective study of mortality.  
44  
45 *Psychol Sci* 2003;14(4):320–7. doi:10.1111/1467-9280.14461  
46
- 47  
48 15. Saito T, Murata C, Saito M, et al. Influence of social relationship domains and their  
49  
50 combinations on incident dementia: a prospective cohort study. *J Epidemiol*  
51  
52 *Community Health* 2017;72(1):7–12. doi: 10.1136/jech-2017-209811  
53
- 54  
55 16. Berkman LF, Kawachi I. *Social Epidemiology*. New York, NY: Oxford University  
56  
57 Press 2015. doi: 10.1093/med/9780195377903.001.0001  
58  
59  
60

- 1  
2  
3 17. Aida J, Kondo K, Kawachi I, et al. Does social capital affect the incidence of  
4 functional disability in older Japanese? A prospective population-based cohort study.  
5 *J Epidemiol Community Health* 2012;67(1):42–7. doi: 10.1136/jech-2011-200307  
6  
7  
8  
9  
10 18. Murayama H, Sugiyama M, Inagaki H, et al. Is community social capital associated  
11 with subjective symptoms of dementia among older people? A cross-sectional study  
12 in Japan. *Geriatr Gerontol Int* 2018;18(11):1537–42. doi:10.1111/ggi.13519  
13  
14  
15  
16  
17 19. Nishi A, Kondo K, Hirai H, et al. (2011). Cohort Profile: the AGES 2003 Cohort  
18 Study in Aichi, Japan. *J Epidemiol* 2011;21(2):151–7. doi: 10.2188/jea.je20100135  
19  
20  
21  
22 20. Hisano S. (2009). The relationship between Revised Hasegawa Dementia Scale  
23 (HDS-R), Mini-Mental State Examination (MMSE) and Bed-fast Scale, Dementia  
24 Scale. *Nihon Ronen Igakkai Zasshi* 2009;20(8):883–91.  
25  
26  
27  
28 21. Takagi D, Kondo K, Kawachi I. Social participation and mental health: moderating  
29 effects of gender, social role and rurality. *BMC Public Health* 2013;13(1):701. doi:  
30 10.1186/1471-2458-13-701  
31  
32  
33  
34  
35 22. Murayama H, Kondo K, Fujiwara Y. Global perspectives on social capital and health  
36 [original in Japanese]. In: Kawachi I, Takao S, Subramanian SV, eds. *Social Capital*  
37 *To Kenkou Seisaku*. 1st ed. Tokyo: Nihon Hyoronsha; 2008:189–210.  
38  
39  
40  
41  
42 23. Murata C, Saito T, Saito M, et al. The association between social support and incident  
43 dementia: a 10-year follow-up study in Japan. *Int J Environ Res Public Health*  
44 2019;16(2):239. doi: 10.3390/ijerph16020239  
45  
46  
47  
48  
49 24. Holwerda TJ, Deeg DJH, Beekman ATF, et al. Feelings of loneliness, but not social  
50 isolation, predict dementia onset: results from the Amsterdam Study of the Elderly  
51 (AMSTEL). *J Neurol Neurosurg Psychiatry* 2012;85(2):135–42. doi: 10.1136/jnnp-  
52 2012-302755  
53  
54  
55  
56  
57  
58  
59  
60

- 1  
2  
3 25. Ownby RL, Crocco E, Acevedo A, John V, Loewenstein D. Depression and risk for  
4  
5 Alzheimer disease: systematic review, meta-analysis, and metaregression analysis.  
6  
7 *Arch Gen Psychiatry* 2006;63(5):530–8. doi:10.1001/archpsyc.63.5.530  
8  
9
- 10 26. Saito M, Kondo N, Aida J, et al. Development of an instrument for community-level  
11  
12 health related social capital among Japanese older people: the JAGES Project  
13  
14 [published correction appears in *J Epidemiol*. 2017 Oct;27(10):503]. *J Epidemiol*  
15  
16 2017;27(5):221–7. doi:10.1016/j.je.2016.06.005  
17  
18
- 19 27. Villalonga-Olives E, Wind TR, Kawachi I. Social capital interventions in public  
20  
21 health: a systematic review. *Soc Sci Med* 2018;212:203–18.  
22  
23 doi:10.1016/j.socscimed.2018.07.022  
24  
25
- 26 28. Ministry of Health, Labor and Welfare. Announcement of the end of the survey  
27  
28 period for the 2020 National Census [original in Japanese].  
29  
30 <https://www.stat.go.jp/data/kokusei/2020/houdou/pdf/20201021.pdf>. Published  
31  
32 October 21, 2020. Accessed February 9, 2021.  
33  
34  
35  
36  
37  
38  
39  
40  
41  
42  
43  
44  
45  
46  
47  
48  
49  
50  
51  
52  
53  
54  
55  
56  
57  
58  
59  
60



**Table S1** Criteria of levels of dementia symptomatology in the Japanese LTCI system

| Rank         | Criteria                                                                                                                                                 | Examples of observable symptoms or behaviors                                                                                                                                                                                                                                               |
|--------------|----------------------------------------------------------------------------------------------------------------------------------------------------------|--------------------------------------------------------------------------------------------------------------------------------------------------------------------------------------------------------------------------------------------------------------------------------------------|
| <b>0</b>     | Independent                                                                                                                                              |                                                                                                                                                                                                                                                                                            |
| <b>I</b>     | Suffers from certain dementia symptoms, but daily living is almost fully independent in the domestic and social spheres.                                 |                                                                                                                                                                                                                                                                                            |
| <b>II</b>    | Manifests some symptoms/behaviors and communication difficulties that may hinder daily activities, but can be independent if someone takes care of them. |                                                                                                                                                                                                                                                                                            |
| <b>II a</b>  | The above-mentioned conditions in II are observed while outside the domestic sphere.                                                                     | Frequently gets lost on the street, or makes noticeable mistakes in matters that the person was previously able to handle, such as shopping, personal administrative tasks, or financial management.                                                                                       |
| <b>II b</b>  | The abovementioned conditions in II are also observed in the domestic sphere.                                                                            | Is unable to manage taking medication or stay alone at home due to an inability to answer the phone or the door.                                                                                                                                                                           |
| <b>III</b>   | Occasionally manifests communication difficulties or symptoms/behaviors that hinder daily activities, thus requiring care.                               |                                                                                                                                                                                                                                                                                            |
| <b>III a</b> | Manifests above-mentioned conditions described in III predominantly during the day.                                                                      | Has difficulty or takes time to change clothes, take meals, defecate, or urinate; puts objects into the mouth, picks up and collects objects, is incontinent, makes loud and incoherent screams, carelessly handles fire, or engages in unhygienic acts or inappropriate sexual acts, etc. |
| <b>III b</b> | Manifests above-mentioned conditions described in III predominantly at night.                                                                            | Same as rank IIIa.                                                                                                                                                                                                                                                                         |
| <b>IV</b>    | Frequently manifests difficulties communicating or symptoms/behaviors that hinder daily activities and constantly requires care.                         | Same as rank III.                                                                                                                                                                                                                                                                          |
| <b>M*</b>    | Manifests significant mental symptoms, problematic behaviors, or severe physical illnesses and requires specialized medical care.                        | Shows continued mental symptoms, such as delirium, delusions, and agitation, and manifests associated problematic behaviors, such as self-mutilation or harm to others.                                                                                                                    |

\*M=Medical

**Table S2** Four categories of social support (including questionnaire items)

|                                    | <b>Receive</b>                                                                                                                                                                                                                                                                                            | <b>Provide</b>                                                                                                                                                                                                                                                                                |
|------------------------------------|-----------------------------------------------------------------------------------------------------------------------------------------------------------------------------------------------------------------------------------------------------------------------------------------------------------|-----------------------------------------------------------------------------------------------------------------------------------------------------------------------------------------------------------------------------------------------------------------------------------------------|
| <b>Emotional social support</b>    | <p>(a) receiving support at the emotional level</p> <p>(Question: "Do you have someone who listens to your concerns and complaints? Circle all that apply. Options included family living together, separated children and relatives, acquaintance/friends/neighbors")</p>                                | <p>(b) providing support at the emotional level</p> <p>(Question: "Do you listen to someone's concerns or complaints? Circle all that apply. Options include family living together, separated children and relatives, acquaintances/friends/neighbors")</p>                                  |
| <b>Instrumental social support</b> | <p>(c) receiving support at the instrumental level</p> <p>(Question: "Do you have someone who looks after you when you are sick and confined to bed for a few days? Circle all that apply. Options include family living together, separated children and relatives, acquaintance/friends/neighbors")</p> | <p>(d) providing support at the instrumental level</p> <p>(Question: "Do you look after someone when he/she is sick and confined to bed for a few days? Circle all that apply. Options include family living together, separated children and relatives, acquaintance/friends/neighbors")</p> |

**Table S3** Descriptive characteristics of the respondents (n = 11,032)

| <i>Individual level variables</i> | n     | %    | Patients with Dementia<br>[ n = 1,776 (16.1% )] |      | Person-year | Incidence rate(IR)<br>per 1000 person-years |              |
|-----------------------------------|-------|------|-------------------------------------------------|------|-------------|---------------------------------------------|--------------|
|                                   |       |      | n                                               | %    |             | IR                                          | 95% CI       |
| <b>Sex</b>                        |       |      |                                                 |      |             |                                             |              |
| Male                              | 5,405 | 49.0 | 746                                             | 13.8 | 41,871      | 17.8                                        | [16.6, 19.1] |
| Female                            | 5,627 | 51.0 | 1,030                                           | 18.3 | 45,362      | 22.7                                        | [21.4, 24.1] |
| <b>Age (years)</b>                |       |      |                                                 |      |             |                                             |              |
| 65-69                             | 4,065 | 36.9 | 207                                             | 5.1  | 35,143      | 5.9                                         | [5.1, 6.7]   |
| 70-74                             | 3,280 | 29.7 | 428                                             | 13.1 | 26,842      | 15.9                                        | [14.5,17.5]  |
| 75-79                             | 2,228 | 20.2 | 548                                             | 24.6 | 16,689      | 32.8                                        | [30.2,35.7]  |
| 80-84                             | 1,012 | 9.2  | 376                                             | 37.2 | 6,502       | 57.8                                        | [52.3,64.0]  |
| 85+                               | 447   | 4.1  | 217                                             | 48.6 | 2,057       | 105.5                                       | [92.4,120.5] |
| <b>Living alone</b>               |       |      |                                                 |      |             |                                             |              |
| No                                | 9,959 | 90.3 | 1,558                                           | 15.6 | 79,038      | 19.7                                        | [18.8,20.7]  |
| Yes                               | 1,073 | 9.7  | 218                                             | 20.3 | 8,194       | 26.6                                        | [23.3,30.4]  |
| <b>Marital status</b>             |       |      |                                                 |      |             |                                             |              |
| Married                           | 7,905 | 71.7 | 1,038                                           | 13.1 | 63,992      | 16.2                                        | [15.3,17.2]  |
| Widowed or divorced               | 2,745 | 24.9 | 658                                             | 24.0 | 20,274      | 32.5                                        | [30.1,35.0]  |
| Never married                     | 190   | 1.7  | 41                                              | 21.6 | 1,453       | 28.2                                        | [20.8,38.3]  |
| Other/Missing                     | 192   | 1.7  | 39                                              | 20.3 | 1,514       | 25.8                                        | [18.8,35.3]  |
| <b>Education (years)</b>          |       |      |                                                 |      |             |                                             |              |
| ≥13                               | 455   | 4.1  | 171                                             | 37.6 | 3,004       | 56.9                                        | [49.0,66.1]  |
| 10-12                             | 6,002 | 54.4 | 963                                             | 16.0 | 47,576      | 20.2                                        | [19.0,21.6]  |
| 6-9                               | 3,341 | 30.3 | 470                                             | 14.1 | 26,908      | 17.5                                        | [16.0,19.1]  |
| <6                                | 1,132 | 10.3 | 149                                             | 13.2 | 8,965       | 16.6                                        | [14.2,19.5]  |
| Other/Missing                     | 102   | 0.9  | 23                                              | 22.6 | 780         | 29.5                                        | [19.6,44.4]  |
| <b>Present illness</b>            |       |      |                                                 |      |             |                                             |              |
| No                                | 2,906 | 26.3 | 354                                             | 12.2 | 24,074      | 14.7                                        | [13.3,16.3]  |
| Yes                               | 7,679 | 69.6 | 1,348                                           | 17.6 | 59,636      | 22.6                                        | [21.4,23.8]  |
| Missing                           | 447   | 4.1  | 74                                              | 16.6 | 3,523       | 21.0                                        | [16.7,26.4]  |
| <b>GDS-15</b>                     |       |      |                                                 |      |             |                                             |              |

|    |                                     |        |      |       |      |        |      |             |
|----|-------------------------------------|--------|------|-------|------|--------|------|-------------|
| 1  |                                     |        |      |       |      |        |      |             |
| 2  |                                     |        |      |       |      |        |      |             |
| 3  | 0-4                                 | 6,737  | 61.1 | 857   | 12.7 | 55,179 | 15.5 | [14.5,16.6] |
| 4  |                                     |        |      |       |      |        |      |             |
| 5  | 5-9                                 | 2,234  | 20.3 | 450   | 20.1 | 16,840 | 26.7 | [24.4,29.3] |
| 6  |                                     |        |      |       |      |        |      |             |
| 7  | 10-15                               | 644    | 5.8  | 170   | 26.4 | 4,393  | 38.7 | [33.3,45.0] |
| 8  |                                     |        |      |       |      |        |      |             |
| 9  | Missing                             | 1,417  | 12.8 | 299   | 21.1 | 10,820 | 27.6 | [24.7,31.0] |
| 10 | Smoking status                      |        |      |       |      |        |      |             |
| 11 | Never                               | 6,501  | 58.9 | 1,129 | 17.4 | 52,412 | 21.5 | [20.3,22.8] |
| 12 |                                     |        |      |       |      |        |      |             |
| 13 | Former                              | 2,757  | 25.0 | 367   | 13.3 | 21,375 | 17.2 | [15.5,19.0] |
| 14 |                                     |        |      |       |      |        |      |             |
| 15 | Current                             | 1,396  | 12.7 | 213   | 15.3 | 10,543 | 20.2 | [17.7,23.1] |
| 16 |                                     |        |      |       |      |        |      |             |
| 17 | Missing                             | 378    | 3.4  | 67    | 17.7 | 2,902  | 23.1 | [18.2,29.3] |
| 18 | Alcohol consumption                 |        |      |       |      |        |      |             |
| 19 | Non                                 | 7,094  | 64.3 | 1,268 | 17.9 | 55,456 | 22.9 | [21.6,24.2] |
| 20 |                                     |        |      |       |      |        |      |             |
| 21 | Does not drink<br>every_day         | 1,513  | 13.7 | 188   | 12.4 | 12,275 | 15.3 | [13.3,17.7] |
| 22 |                                     |        |      |       |      |        |      |             |
| 23 | Drinks every_day $\leq$<br>35 g/day | 1,769  | 16.0 | 233   | 13.2 | 14,247 | 16.4 | [14.4,18.6] |
| 24 |                                     |        |      |       |      |        |      |             |
| 25 | Drinks every_day $>$<br>35 g/day    | 495    | 4.5  | 49    | 9.9  | 4,032  | 12.2 | [9.2,16.1]  |
| 26 |                                     |        |      |       |      |        |      |             |
| 27 | Missing                             | 161    | 1.5  | 38    | 23.6 | 1,222  | 31.1 | [22.6,42.7] |
| 28 |                                     |        |      |       |      |        |      |             |
| 29 | Social supports                     |        |      |       |      |        |      |             |
| 30 | Receiving emotional<br>support      |        |      |       |      |        |      |             |
| 31 |                                     |        |      |       |      |        |      |             |
| 32 | No                                  | 1,089  | 9.9  | 208   | 19.1 | 8,161  | 25.5 | [22.2,29.2] |
| 33 |                                     |        |      |       |      |        |      |             |
| 34 | Yes                                 | 9,943  | 90.1 | 1,568 | 15.8 | 79,071 | 19.8 | [18.9,20.8] |
| 35 |                                     |        |      |       |      |        |      |             |
| 36 | Providing emotional<br>support      |        |      |       |      |        |      |             |
| 37 |                                     |        |      |       |      |        |      |             |
| 38 | No                                  | 1,836  | 16.6 | 409   | 22.3 | 13,135 | 31.1 | [28.3,34.3] |
| 39 |                                     |        |      |       |      |        |      |             |
| 40 | Yes                                 | 9,196  | 83.4 | 1,367 | 14.9 | 74,097 | 18.4 | [17.5,19.5] |
| 41 |                                     |        |      |       |      |        |      |             |
| 42 | Receiving<br>instrumental support   |        |      |       |      |        |      |             |
| 43 |                                     |        |      |       |      |        |      |             |
| 44 | No                                  | 868    | 7.9  | 112   | 18.1 | 4,849  | 23.1 | [19.2,27.8] |
| 45 |                                     |        |      |       |      |        |      |             |
| 46 | Yes                                 | 10,164 | 92.1 | 1,664 | 16.0 | 82,384 | 20.2 | [19.3,21.2] |
| 47 |                                     |        |      |       |      |        |      |             |
| 48 | Providing<br>instrumental support   |        |      |       |      |        |      |             |
| 49 |                                     |        |      |       |      |        |      |             |
| 50 | No                                  | 619    | 5.6  | 250   | 28.8 | 6,044  | 41.4 | [36.5,46.8] |
| 51 |                                     |        |      |       |      |        |      |             |
| 52 | Yes                                 | 10,413 | 94.4 | 1,526 | 15.0 | 81,189 | 18.8 | [17.9,19.8] |
| 53 |                                     |        |      |       |      |        |      |             |
| 54 |                                     |        |      |       |      |        |      |             |
| 55 |                                     |        |      |       |      |        |      |             |
| 56 |                                     |        |      |       |      |        |      |             |
| 57 |                                     |        |      |       |      |        |      |             |
| 58 |                                     |        |      |       |      |        |      |             |
| 59 |                                     |        |      |       |      |        |      |             |
| 60 |                                     |        |      |       |      |        |      |             |

**Table S4** Results of multilevel survival analyses for onset of incident dementia (Full version of Table 3, including individual-level results)

|                                         | Model 1           | Model 2 (1 year)   | Model 3 (2 year)   | Model 4 (3 year)   |
|-----------------------------------------|-------------------|--------------------|--------------------|--------------------|
|                                         | n = 11,032        | n=10,780           | n = 10,440         | n = 10,071         |
| <i>Fixed effect</i>                     | HR (95% CI)       | HR (95% CI)        | HR (95% CI)        | HR (95% CI)        |
| <i>Community level variables</i>        |                   |                    |                    |                    |
| Rate of receiving emotional support*    | 0.96 (0.94-0.99)  | 0.97 (0.94-0.99)   | 0.97 (0.94-0.99)   | 0.97 (0.94-0.988)  |
| Rate of providing emotional support*    | 0.99 (0.96-1.01)  | 0.99 (0.96-1.01)   | 0.98 (0.95-1.01)   | 0.98 (0.95-1.01)   |
| Rate of receiving instrumental support* | 1.01 (0.97-1.04)  | 1.01 (0.97-1.04)   | 1.01 (0.97-1.05)   | 1.01 (0.97-1.06)   |
| Rate of providing instrumental support* | 1.00 (0.97-1.03)  | 1.00 (0.97-1.02)   | 1.00 (0.97-1.03)   | 1.00 (0.97-1.04)   |
| <i>Individual level variables</i>       |                   |                    |                    |                    |
| Social supports                         |                   |                    |                    |                    |
| Receiving emotional support             |                   |                    |                    |                    |
| No                                      | 1.0 (reference)   | 1.0 (reference)    | 1.0 (reference)    | 1.0 (reference)    |
| Yes                                     | 1.04 (0.88-1.22)  | 1.03 (0.87-1.22)   | 1.03 (0.87-1.23)   | 0.99 (0.83-1.19)   |
| Providing emotional support             |                   |                    |                    |                    |
| No                                      | 1.0 (reference)   | 1.0 (reference)    | 1.0 (reference)    | 1.0 (reference)    |
| Yes                                     | 0.83 (0.73-0.94)  | 0.88 (0.77-0.997)  | 0.91 (0.80-1.04)   | 0.91 (0.79-1.05)   |
| Receiving instrumental support          |                   |                    |                    |                    |
| No                                      | 1.0 (reference)   | 1.0 (reference)    | 1.0 (reference)    | 1.0 (reference)    |
| Yes                                     | 1.22 (0.99-1.51)  | 1.18 (0.95-1.47)   | 1.13 (0.90-1.42)   | 1.15 (0.91-1.47)   |
| Providing instrumental support          |                   |                    |                    |                    |
| No                                      | 1.0 (reference)   | 1.0 (reference)    | 1.0 (reference)    | 1.0 (reference)    |
| Yes                                     | 0.76 (0.66-0.89)  | 0.82 (0.70-0.96)   | 0.85 (0.72-1.01)   | 0.89 (0.74-1.07)   |
| Sex                                     |                   |                    |                    |                    |
| Male                                    | 1.0 (reference)   | 1.0 (reference)    | 1.0 (reference)    | 1.0 (reference)    |
| Female                                  | 1.01 (0.87-1.18)  | 1.03 (0.88-1.20)   | 1.06 (0.90-1.24)   | 1.08 (0.91-1.28)   |
| Age (years)                             |                   |                    |                    |                    |
| 65-69                                   | 1.0 (reference)   | 1.0 (reference)    | 1.0 (reference)    | 1.0 (reference)    |
| 70-74                                   | 2.64 (2.23-3.12)  | 2.67 (2.25-3.16)   | 2.65 (2.22-3.16)   | 2.71 (2.26-3.25)   |
| 75-79                                   | 5.42 (4.60-6.38)  | 5.59 (4.73-6.61)   | 5.84 (4.93-6.93)   | 5.97 (5.00-7.13)   |
| 80-84                                   | 9.85 (8.24-11.78) | 10.08 (8.40-12.10) | 10.30 (8.53-12.43) | 10.31 (8.46-12.56) |

|    |                          |                     |                     |                     |                     |
|----|--------------------------|---------------------|---------------------|---------------------|---------------------|
| 1  |                          |                     |                     |                     |                     |
| 2  |                          |                     |                     |                     |                     |
| 3  | 85+                      | 19.01 (15.38-23.50) | 19.32 (15.52-24.06) | 19.32 (15.33-24.34) | 18.64 (14.52-23.92) |
| 4  |                          |                     |                     |                     |                     |
| 5  | Living alone             |                     |                     |                     |                     |
| 6  |                          |                     |                     |                     |                     |
| 7  | No                       | 1.0 (reference)     | 1.0 (reference)     | 1.0 (reference)     | 1.0 (reference)     |
| 8  |                          |                     |                     |                     |                     |
| 9  | Yes                      | 0.94 (0.80-1.11)    | 0.94 (0.79-1.12)    | 0.98 (0.82-1.17)    | 1.03 (0.86-1.24)    |
| 10 | Marital status           |                     |                     |                     |                     |
| 11 |                          |                     |                     |                     |                     |
| 12 | Married                  | 1.0 (reference)     | 1.0 (reference)     | 1.0 (reference)     | 1.0 (reference)     |
| 13 |                          |                     |                     |                     |                     |
| 14 | Widowed or divorced      | 1.09 (0.96-1.24)    | 1.09 (0.96-1.24)    | 1.06 (0.92-1.21)    | 1.00 (0.86-1.15)    |
| 15 |                          |                     |                     |                     |                     |
| 16 | Never married            | 1.28 (0.92-1.78)    | 1.22 (0.87-1.73)    | 1.24 (0.87-1.76)    | 1.25 (0.87-1.79)    |
| 17 |                          |                     |                     |                     |                     |
| 18 | Other/Missing            | 1.12 (0.80-1.56)    | 1.13 (0.80-1.58)    | 1.09 (0.77-1.56)    | 1.09 (0.76-1.57)    |
| 19 | Education (years)        |                     |                     |                     |                     |
| 20 |                          |                     |                     |                     |                     |
| 21 | ≥13                      | 1.0 (reference)     | 1.0 (reference)     | 1.0 (reference)     | 1.0 (reference)     |
| 22 |                          |                     |                     |                     |                     |
| 23 | 10-12                    | 0.89 (0.74-1.08)    | 0.89 (0.74-1.08)    | 0.89 (0.73-1.08)    | 0.92 (0.75-1.13)    |
| 24 |                          |                     |                     |                     |                     |
| 25 | 6-9                      | 0.96 (0.80-1.15)    | 0.95 (0.79-1.14)    | 0.95 (0.79-1.15)    | 0.96 (0.79-1.16)    |
| 26 |                          |                     |                     |                     |                     |
| 27 | <6                       | 1.29 (1.02-1.63)    | 1.24 (0.97-1.57)    | 1.22 (0.95-1.57)    | 1.23 (0.95-1.61)    |
| 28 |                          |                     |                     |                     |                     |
| 29 | Other/Missing            | 0.89 (0.57-1.40)    | 0.82 (0.51-1.33)    | 0.80 (0.48-1.33)    | 0.86 (0.51-1.45)    |
| 30 | Present illness          |                     |                     |                     |                     |
| 31 |                          |                     |                     |                     |                     |
| 32 | No                       | 1.0 (reference)     | 1.0 (reference)     | 1.0 (reference)     | 1.0 (reference)     |
| 33 |                          |                     |                     |                     |                     |
| 34 | Yes                      | 1.15 (1.02-1.30)    | 1.13 (1.00-1.28)    | 1.13 (1.00-1.28)    | 1.10 (0.96-1.26)    |
| 35 |                          |                     |                     |                     |                     |
| 36 | Missing                  | 0.96 (0.75-1.24)    | 0.98 (0.75-1.27)    | 0.99 (0.75-1.29)    | 1.01 (0.76-1.33)    |
| 37 | GDS-15                   |                     |                     |                     |                     |
| 38 |                          |                     |                     |                     |                     |
| 39 | 0-4                      | 1.0 (reference)     | 1.0 (reference)     | 1.0 (reference)     | 1.0 (reference)     |
| 40 |                          |                     |                     |                     |                     |
| 41 | 5-9                      | 1.54 (1.37-1.73)    | 1.54 (1.37-1.74)    | 1.48 (1.31-1.68)    | 1.49 (1.30-1.69)    |
| 42 |                          |                     |                     |                     |                     |
| 43 | 10-15                    | 2.33 (1.96-2.77)    | 2.18 (1.82-2.62)    | 2.16 (1.79-2.62)    | 2.17 (1.78-2.66)    |
| 44 |                          |                     |                     |                     |                     |
| 45 | Missing                  | 1.47 (1.28-1.68)    | 1.43 (1.25-1.64)    | 1.41 (1.22-1.63)    | 1.41 (1.22-1.64)    |
| 46 | Smoking status           |                     |                     |                     |                     |
| 47 |                          |                     |                     |                     |                     |
| 48 | Never                    | 1.0 (reference)     | 1.0 (reference)     | 1.0 (reference)     | 1.0 (reference)     |
| 49 |                          |                     |                     |                     |                     |
| 50 | Former                   | 0.99 (0.85-1.16)    | 1.00 (0.86-1.18)    | 0.99 (0.84-1.17)    | 1.02 (0.86-1.21)    |
| 51 |                          |                     |                     |                     |                     |
| 52 | Current                  | 1.34 (1.12-1.60)    | 1.32 (1.10-1.59)    | 1.39 (1.15-1.68)    | 1.40 (1.15-1.71)    |
| 53 |                          |                     |                     |                     |                     |
| 54 | Missing                  | 0.86 (0.65-1.15)    | 0.90 (0.67-1.20)    | 0.85 (0.63-1.15)    | 0.91 (0.67-1.24)    |
| 55 | Alcohol consumption      |                     |                     |                     |                     |
| 56 |                          |                     |                     |                     |                     |
| 57 | Non                      | 1.0 (reference)     | 1.0 (reference)     | 1.0 (reference)     | 1.0 (reference)     |
| 58 |                          |                     |                     |                     |                     |
| 59 | Does not drink every_day | 0.96 (0.82-1.13)    | 0.96 (0.81-1.13)    | 0.97 (0.82-1.15)    | 0.96 (0.80-1.15)    |
| 60 |                          |                     |                     |                     |                     |

|                                     |                      |                      |                      |                  |
|-------------------------------------|----------------------|----------------------|----------------------|------------------|
| Drinks every_day $\leq$<br>35 g/day | 0.98 (0.84-<br>1.15) | 0.99 (0.84-<br>1.16) | 1.02 (0.86-<br>1.20) | 1.03 (0.87-1.22) |
| Drinks every_day $>$<br>35 g/day    | 0.86 (0.64-<br>1.17) | 0.90 (0.66-<br>1.21) | 0.92 (0.68-<br>1.26) | 0.91 (0.66-1.26) |
| Missing                             | 1.14 (0.78-<br>1.66) | 1.14 (0.78-<br>1.67) | 1.24 (0.84-<br>1.83) | 1.22 (0.82-1.83) |
| <i>Random effects</i>               |                      |                      |                      |                  |
| Community level variance<br>(SE)    | 0.06 (0.05)          | 0.04 (0.06)          | 0.04 (0.07)          | 0.09 (0.04)      |

\*HR for one point increment of community social support (range: 0-100)

For peer review only

## STROBE Statement—checklist of items that should be included in reports of observational studies

|                              | Item No | Recommendation                                                                                                                                                                                                                                                                                                                                                                                                                                                         | Page No |
|------------------------------|---------|------------------------------------------------------------------------------------------------------------------------------------------------------------------------------------------------------------------------------------------------------------------------------------------------------------------------------------------------------------------------------------------------------------------------------------------------------------------------|---------|
| <b>Title and abstract</b>    | 1       | (a) Indicate the study's design with a commonly used term in the title or the abstract                                                                                                                                                                                                                                                                                                                                                                                 | 1       |
|                              |         | (b) Provide in the abstract an informative and balanced summary of what was done and what was found                                                                                                                                                                                                                                                                                                                                                                    | 2       |
| <b>Introduction</b>          |         |                                                                                                                                                                                                                                                                                                                                                                                                                                                                        |         |
| Background/rationale         | 2       | Explain the scientific background and rationale for the investigation being reported                                                                                                                                                                                                                                                                                                                                                                                   | 4-5     |
| Objectives                   | 3       | State specific objectives, including any prespecified hypotheses                                                                                                                                                                                                                                                                                                                                                                                                       | 5       |
| <b>Methods</b>               |         |                                                                                                                                                                                                                                                                                                                                                                                                                                                                        |         |
| Study design                 | 4       | Present key elements of study design early in the paper                                                                                                                                                                                                                                                                                                                                                                                                                | 5       |
| Setting                      | 5       | Describe the setting, locations, and relevant dates, including periods of recruitment, exposure, follow-up, and data collection                                                                                                                                                                                                                                                                                                                                        | 5-6     |
| Participants                 | 6       | (a) <i>Cohort study</i> —Give the eligibility criteria, and the sources and methods of selection of participants. Describe methods of follow-up<br><i>Case-control study</i> —Give the eligibility criteria, and the sources and methods of case ascertainment and control selection. Give the rationale for the choice of cases and controls<br><i>Cross-sectional study</i> —Give the eligibility criteria, and the sources and methods of selection of participants | 5-6     |
|                              |         | (b) <i>Cohort study</i> —For matched studies, give matching criteria and number of exposed and unexposed<br><i>Case-control study</i> —For matched studies, give matching criteria and the number of controls per case                                                                                                                                                                                                                                                 | 5-6     |
| Variables                    | 7       | Clearly define all outcomes, exposures, predictors, potential confounders, and effect modifiers. Give diagnostic criteria, if applicable                                                                                                                                                                                                                                                                                                                               | 6-7     |
| Data sources/<br>measurement | 8*      | For each variable of interest, give sources of data and details of methods of assessment (measurement). Describe comparability of assessment methods if there is more than one group                                                                                                                                                                                                                                                                                   | 6-9     |
| Bias                         | 9       | Describe any efforts to address potential sources of bias                                                                                                                                                                                                                                                                                                                                                                                                              | 5-6     |
| Study size                   | 10      | Explain how the study size was arrived at                                                                                                                                                                                                                                                                                                                                                                                                                              | 5-6     |
| Quantitative variables       | 11      | Explain how quantitative variables were handled in the analyses. If applicable, describe which groupings were chosen and why                                                                                                                                                                                                                                                                                                                                           | 6-9     |
| Statistical methods          | 12      | (a) Describe all statistical methods, including those used to control for confounding                                                                                                                                                                                                                                                                                                                                                                                  | 6-10    |
|                              |         | (b) Describe any methods used to examine subgroups and interactions                                                                                                                                                                                                                                                                                                                                                                                                    | 6-10    |
|                              |         | (c) Explain how missing data were addressed                                                                                                                                                                                                                                                                                                                                                                                                                            | 6-10    |
|                              | 6       | (d) <i>Cohort study</i> —If applicable, explain how loss to follow-up was addressed<br><i>Case-control study</i> —If applicable, explain how matching of cases and controls was addressed<br><i>Cross-sectional study</i> —If applicable, describe analytical methods taking account of sampling strategy                                                                                                                                                              |         |
|                              |         | (e) Describe any sensitivity analyses                                                                                                                                                                                                                                                                                                                                                                                                                                  | 10      |

Continued on next page



1  
2  
3  
4  
5  
6  
7  
8  
9  
10  
11  
12  
13  
14  
15  
16  
17  
18  
19  
20  
21  
22  
23  
24  
25  
26  
27  
28  
29  
30  
31  
32  
33  
34  
35  
36  
37  
38  
39  
40  
41  
42  
43  
44  
45  
46  
47  
48  
49  
50  
51  
52  
53  
54  
55  
56  
57  
58  
59  
60

| <b>Results</b>           |     |                                                                                                                                                                                                              |       |
|--------------------------|-----|--------------------------------------------------------------------------------------------------------------------------------------------------------------------------------------------------------------|-------|
| Participants             | 13* | (a) Report numbers of individuals at each stage of study—eg numbers potentially eligible, examined for eligibility, confirmed eligible, included in the study, completing follow-up, and analysed            | 5-6   |
|                          |     | (b) Give reasons for non-participation at each stage                                                                                                                                                         |       |
|                          |     | (c) Consider use of a flow diagram                                                                                                                                                                           |       |
| Descriptive data         | 14* | (a) Give characteristics of study participants (eg demographic, clinical, social) and information on exposures and potential confounders                                                                     | 10    |
|                          |     | (b) Indicate number of participants with missing data for each variable of interest                                                                                                                          |       |
|                          |     | (c) <i>Cohort study</i> —Summarise follow-up time (eg, average and total amount)                                                                                                                             |       |
| Outcome data             | 15* | <i>Cohort study</i> —Report numbers of outcome events or summary measures over time                                                                                                                          | 6     |
|                          |     | <i>Case-control study</i> —Report numbers in each exposure category, or summary measures of exposure                                                                                                         |       |
|                          |     | <i>Cross-sectional study</i> —Report numbers of outcome events or summary measures                                                                                                                           |       |
| Main results             | 16  | (a) Give unadjusted estimates and, if applicable, confounder-adjusted estimates and their precision (eg, 95% confidence interval). Make clear which confounders were adjusted for and why they were included | 10-12 |
|                          |     | (b) Report category boundaries when continuous variables were categorized                                                                                                                                    |       |
|                          |     | (c) If relevant, consider translating estimates of relative risk into absolute risk for a meaningful time period                                                                                             |       |
| Other analyses           | 17  | Report other analyses done—eg analyses of subgroups and interactions, and sensitivity analyses                                                                                                               | 11-12 |
| <b>Discussion</b>        |     |                                                                                                                                                                                                              |       |
| Key results              | 18  | Summarise key results with reference to study objectives                                                                                                                                                     | 12-15 |
| Limitations              | 19  | Discuss limitations of the study, taking into account sources of potential bias or imprecision. Discuss both direction and magnitude of any potential bias                                                   | 14-15 |
| Interpretation           | 20  | Give a cautious overall interpretation of results considering objectives, limitations, multiplicity of analyses, results from similar studies, and other relevant evidence                                   | 14-15 |
| Generalisability         | 21  | Discuss the generalisability (external validity) of the study results                                                                                                                                        | 12-13 |
| <b>Other information</b> |     |                                                                                                                                                                                                              |       |
| Funding                  | 22  | Give the source of funding and the role of the funders for the present study and, if applicable, for the original study on which the present article is based                                                | 16    |

\*Give information separately for cases and controls in case-control studies and, if applicable, for exposed and unexposed groups in cohort and cross-sectional studies.

**Note:** An Explanation and Elaboration article discusses each checklist item and gives methodological background and published examples of transparent reporting. The STROBE checklist is best used in conjunction with this article (freely available on the Web sites of PLoS Medicine at <http://www.plosmedicine.org/>, Annals of Internal Medicine at <http://www.annals.org/>, and Epidemiology at <http://www.epidem.com/>). Information on the STROBE Initiative is available at [www.strobe-statement.org](http://www.strobe-statement.org).
