# Supplementary material for: Community social support and onset of dementia in older Japanese individuals: a multilevel analysis using the JAGES cohort data
Source: PubMed Central journal article supplement — BMJ Open. 2021 Jun 3;11(6):e044631. doi: 10.1136/bmjopen-2020-044631 (PMC8183266; doi:10.1136/bmjopen-2020-044631), 2021-06-03
Supplement: bmjopen-2020-044631supp001.pdf [file bmjopen-2020-044631supp001.pdf]

**Table S1** Criteria of levels of dementia symptomatology in the Japanese LTCI system

| <b>Rank</b>  | <b>Criteria</b>                                                                                                                                          | <b>Examples of observable symptoms or behaviors</b>                                                                                                                                                                                                                                        |
|--------------|----------------------------------------------------------------------------------------------------------------------------------------------------------|--------------------------------------------------------------------------------------------------------------------------------------------------------------------------------------------------------------------------------------------------------------------------------------------|
| <b>0</b>     | Independent                                                                                                                                              |                                                                                                                                                                                                                                                                                            |
| <b>I</b>     | Suffers from certain dementia symptoms, but daily living is almost fully independent in the domestic and social spheres.                                 |                                                                                                                                                                                                                                                                                            |
| <b>II</b>    | Manifests some symptoms/behaviors and communication difficulties that may hinder daily activities, but can be independent if someone takes care of them. |                                                                                                                                                                                                                                                                                            |
| <b>II a</b>  | The above-mentioned conditions in II are observed while outside the domestic sphere.                                                                     | Frequently gets lost on the street, or makes noticeable mistakes in matters that the person was previously able to handle, such as shopping, personal administrative tasks, or financial management.                                                                                       |
| <b>II b</b>  | The abovementioned conditions in II are also observed in the domestic sphere.                                                                            | Is unable to manage taking medication or stay alone at home due to an inability to answer the phone or the door.                                                                                                                                                                           |
| <b>III</b>   | Occasionally manifests communication difficulties or symptoms/behaviors that hinder daily activities, thus requiring care.                               |                                                                                                                                                                                                                                                                                            |
| <b>III a</b> | Manifests above-mentioned conditions described in III predominantly during the day.                                                                      | Has difficulty or takes time to change clothes, take meals, defecate, or urinate; puts objects into the mouth, picks up and collects objects, is incontinent, makes loud and incoherent screams, carelessly handles fire, or engages in unhygienic acts or inappropriate sexual acts, etc. |
| <b>III b</b> | Manifests above-mentioned conditions described in III predominantly at night. Frequently manifests difficulties communicating                            | Same as rank IIIa.                                                                                                                                                                                                                                                                         |
| <b>IV</b>    | or symptoms/behaviors that hinder daily activities and constantly requires care.                                                                         | Same as rank III.                                                                                                                                                                                                                                                                          |
| <b>M*</b>    | Manifests significant mental symptoms, problematic behaviors, or severe physical illnesses and requires specialized medical care.                        | Shows continued mental symptoms, such as delirium, delusions, and agitation, and manifests associated problematic behaviors, such as self-mutilation or harm to others.                                                                                                                    |

\*M=Medical

**Table S2** Four categories of social support (including questionnaire items)

|                                    | <b>Receive</b>                                                                                                                                                                                                                                                                                            | <b>Provide</b>                                                                                                                                                                                                                                                                                |
|------------------------------------|-----------------------------------------------------------------------------------------------------------------------------------------------------------------------------------------------------------------------------------------------------------------------------------------------------------|-----------------------------------------------------------------------------------------------------------------------------------------------------------------------------------------------------------------------------------------------------------------------------------------------|
| <b>Emotional social support</b>    | <p>(a) receiving support at the emotional level</p> <p>(Question: "Do you have someone who listens to your concerns and complaints? Circle all that apply. Options included family living together, separated children and relatives, acquaintance/friends/neighbors")</p>                                | <p>(b) providing support at the emotional level</p> <p>(Question: "Do you listen to someone's concerns or complaints? Circle all that apply. Options include family living together, separated children and relatives, acquaintances/friends/neighbors")</p>                                  |
| <b>Instrumental social support</b> | <p>(c) receiving support at the instrumental level</p> <p>(Question: "Do you have someone who looks after you when you are sick and confined to bed for a few days? Circle all that apply. Options include family living together, separated children and relatives, acquaintance/friends/neighbors")</p> | <p>(d) providing support at the instrumental level</p> <p>(Question: "Do you look after someone when he/she is sick and confined to bed for a few days? Circle all that apply. Options include family living together, separated children and relatives, acquaintance/friends/neighbors")</p> |

**Table S3** Descriptive characteristics of the respondents (n = 11,032)

| <i>Individual level variables</i> | n     | %    | Patients with Dementia<br>[ n = 1,776 (16.1% )] |      | Person-year | Incidence rate(IR)<br>per 1000 person-years |              |
|-----------------------------------|-------|------|-------------------------------------------------|------|-------------|---------------------------------------------|--------------|
|                                   |       |      | n                                               | %    |             | IR                                          | 95% CI       |
| <b>Sex</b>                        |       |      |                                                 |      |             |                                             |              |
| Male                              | 5,405 | 49.0 | 746                                             | 13.8 | 41,871      | 17.8                                        | [16.6, 19.1] |
| Female                            | 5,627 | 51.0 | 1,030                                           | 18.3 | 45,362      | 22.7                                        | [21.4, 24.1] |
| <b>Age (years)</b>                |       |      |                                                 |      |             |                                             |              |
| 65-69                             | 4,065 | 36.9 | 207                                             | 5.1  | 35,143      | 5.9                                         | [5.1, 6.7]   |
| 70-74                             | 3,280 | 29.7 | 428                                             | 13.1 | 26,842      | 15.9                                        | [14.5,17.5]  |
| 75-79                             | 2,228 | 20.2 | 548                                             | 24.6 | 16,689      | 32.8                                        | [30.2,35.7]  |
| 80-84                             | 1,012 | 9.2  | 376                                             | 37.2 | 6,502       | 57.8                                        | [52.3,64.0]  |
| 85+                               | 447   | 4.1  | 217                                             | 48.6 | 2,057       | 105.5                                       | [92.4,120.5] |
| <b>Living alone</b>               |       |      |                                                 |      |             |                                             |              |
| No                                | 9,959 | 90.3 | 1,558                                           | 15.6 | 79,038      | 19.7                                        | [18.8,20.7]  |
| Yes                               | 1,073 | 9.7  | 218                                             | 20.3 | 8,194       | 26.6                                        | [23.3,30.4]  |
| <b>Marital status</b>             |       |      |                                                 |      |             |                                             |              |
| Married                           | 7,905 | 71.7 | 1,038                                           | 13.1 | 63,992      | 16.2                                        | [15.3,17.2]  |
| Widowed or divorced               | 2,745 | 24.9 | 658                                             | 24.0 | 20,274      | 32.5                                        | [30.1,35.0]  |
| Never married                     | 190   | 1.7  | 41                                              | 21.6 | 1,453       | 28.2                                        | [20.8,38.3]  |
| Other/Missing                     | 192   | 1.7  | 39                                              | 20.3 | 1,514       | 25.8                                        | [18.8,35.3]  |
| <b>Education (years)</b>          |       |      |                                                 |      |             |                                             |              |
| ≥13                               | 455   | 4.1  | 171                                             | 37.6 | 3,004       | 56.9                                        | [49.0,66.1]  |
| 10-12                             | 6,002 | 54.4 | 963                                             | 16.0 | 47,576      | 20.2                                        | [19.0,21.6]  |
| 6-9                               | 3,341 | 30.3 | 470                                             | 14.1 | 26,908      | 17.5                                        | [16.0,19.1]  |
| <6                                | 1,132 | 10.3 | 149                                             | 13.2 | 8,965       | 16.6                                        | [14.2,19.5]  |
| Other/Missing                     | 102   | 0.9  | 23                                              | 22.6 | 780         | 29.5                                        | [19.6,44.4]  |
| <b>Present illness</b>            |       |      |                                                 |      |             |                                             |              |
| No                                | 2,906 | 26.3 | 354                                             | 12.2 | 24,074      | 14.7                                        | [13.3,16.3]  |
| Yes                               | 7,679 | 69.6 | 1,348                                           | 17.6 | 59,636      | 22.6                                        | [21.4,23.8]  |
| Missing                           | 447   | 4.1  | 74                                              | 16.6 | 3,523       | 21.0                                        | [16.7,26.4]  |
| <b>GDS-15</b>                     |       |      |                                                 |      |             |                                             |              |

|                                  |        |      |       |      |        |      |             |
|----------------------------------|--------|------|-------|------|--------|------|-------------|
| 0-4                              | 6,737  | 61.1 | 857   | 12.7 | 55,179 | 15.5 | [14.5,16.6] |
| 5-9                              | 2,234  | 20.3 | 450   | 20.1 | 16,840 | 26.7 | [24.4,29.3] |
| 10-15                            | 644    | 5.8  | 170   | 26.4 | 4,393  | 38.7 | [33.3,45.0] |
| Missing                          | 1,417  | 12.8 | 299   | 21.1 | 10,820 | 27.6 | [24.7,31.0] |
| Smoking status                   |        |      |       |      |        |      |             |
| Never                            | 6,501  | 58.9 | 1,129 | 17.4 | 52,412 | 21.5 | [20.3,22.8] |
| Former                           | 2,757  | 25.0 | 367   | 13.3 | 21,375 | 17.2 | [15.5,19.0] |
| Current                          | 1,396  | 12.7 | 213   | 15.3 | 10,543 | 20.2 | [17.7,23.1] |
| Missing                          | 378    | 3.4  | 67    | 17.7 | 2,902  | 23.1 | [18.2,29.3] |
| Alcohol consumption              |        |      |       |      |        |      |             |
| Non                              | 7,094  | 64.3 | 1,268 | 17.9 | 55,456 | 22.9 | [21.6,24.2] |
| Does not drink every_day         | 1,513  | 13.7 | 188   | 12.4 | 12,275 | 15.3 | [13.3,17.7] |
| Drinks every_day $\leq$ 35 g/day | 1,769  | 16.0 | 233   | 13.2 | 14,247 | 16.4 | [14.4,18.6] |
| Drinks every_day $>$ 35 g/day    | 495    | 4.5  | 49    | 9.9  | 4,032  | 12.2 | [9.2,16.1]  |
| Missing                          | 161    | 1.5  | 38    | 23.6 | 1,222  | 31.1 | [22.6,42.7] |
| Social supports                  |        |      |       |      |        |      |             |
| Receiving emotional support      |        |      |       |      |        |      |             |
| No                               | 1,089  | 9.9  | 208   | 19.1 | 8,161  | 25.5 | [22.2,29.2] |
| Yes                              | 9,943  | 90.1 | 1,568 | 15.8 | 79,071 | 19.8 | [18.9,20.8] |
| Providing emotional support      |        |      |       |      |        |      |             |
| No                               | 1,836  | 16.6 | 409   | 22.3 | 13,135 | 31.1 | [28.3,34.3] |
| Yes                              | 9,196  | 83.4 | 1,367 | 14.9 | 74,097 | 18.4 | [17.5,19.5] |
| Receiving instrumental support   |        |      |       |      |        |      |             |
| No                               | 868    | 7.9  | 112   | 18.1 | 4,849  | 23.1 | [19.2,27.8] |
| Yes                              | 10,164 | 92.1 | 1,664 | 16.0 | 82,384 | 20.2 | [19.3,21.2] |
| Providing instrumental support   |        |      |       |      |        |      |             |
| No                               | 619    | 5.6  | 250   | 28.8 | 6,044  | 41.4 | [36.5,46.8] |
| Yes                              | 10,413 | 94.4 | 1,526 | 15.0 | 81,189 | 18.8 | [17.9,19.8] |

**Table S4** Results of multilevel survival analyses for onset of incident dementia (Full version of Table 3, including individual-level results)

|                                         | Model 1           | Model 2 (1 year)   | Model 3 (2 year)   | Model 4 (3 year)   |
|-----------------------------------------|-------------------|--------------------|--------------------|--------------------|
|                                         | n = 11,032        | n=10,780           | n = 10,440         | n = 10,071         |
| <i>Fixed effect</i>                     | HR (95% CI)       | HR (95% CI)        | HR (95% CI)        | HR (95% CI)        |
| <i>Community level variables</i>        |                   |                    |                    |                    |
| Rate of receiving emotional support*    | 0.96 (0.94-0.99)  | 0.97 (0.94-0.99)   | 0.97 (0.94-0.99)   | 0.97 (0.94-0.988)  |
| Rate of providing emotional support*    | 0.99 (0.96-1.01)  | 0.99 (0.96-1.01)   | 0.98 (0.95-1.01)   | 0.98 (0.95-1.01)   |
| Rate of receiving instrumental support* | 1.01 (0.97-1.04)  | 1.01 (0.97-1.04)   | 1.01 (0.97-1.05)   | 1.01 (0.97-1.06)   |
| Rate of providing instrumental support* | 1.00 (0.97-1.03)  | 1.00 (0.97-1.02)   | 1.00 (0.97-1.03)   | 1.00 (0.97-1.04)   |
| <i>Individual level variables</i>       |                   |                    |                    |                    |
| Social supports                         |                   |                    |                    |                    |
| Receiving emotional support             |                   |                    |                    |                    |
| No                                      | 1.0 (reference)   | 1.0 (reference)    | 1.0 (reference)    | 1.0 (reference)    |
| Yes                                     | 1.04 (0.88-1.22)  | 1.03 (0.87-1.22)   | 1.03 (0.87-1.23)   | 0.99 (0.83-1.19)   |
| Providing emotional support             |                   |                    |                    |                    |
| No                                      | 1.0 (reference)   | 1.0 (reference)    | 1.0 (reference)    | 1.0 (reference)    |
| Yes                                     | 0.83 (0.73-0.94)  | 0.88 (0.77-0.997)  | 0.91 (0.80-1.04)   | 0.91 (0.79-1.05)   |
| Receiving instrumental support          |                   |                    |                    |                    |
| No                                      | 1.0 (reference)   | 1.0 (reference)    | 1.0 (reference)    | 1.0 (reference)    |
| Yes                                     | 1.22 (0.99-1.51)  | 1.18 (0.95-1.47)   | 1.13 (0.90-1.42)   | 1.15 (0.91-1.47)   |
| Providing instrumental support          |                   |                    |                    |                    |
| No                                      | 1.0 (reference)   | 1.0 (reference)    | 1.0 (reference)    | 1.0 (reference)    |
| Yes                                     | 0.76 (0.66-0.89)  | 0.82 (0.70-0.96)   | 0.85 (0.72-1.01)   | 0.89 (0.74-1.07)   |
| Sex                                     |                   |                    |                    |                    |
| Male                                    | 1.0 (reference)   | 1.0 (reference)    | 1.0 (reference)    | 1.0 (reference)    |
| Female                                  | 1.01 (0.87-1.18)  | 1.03 (0.88-1.20)   | 1.06 (0.90-1.24)   | 1.08 (0.91-1.28)   |
| Age (years)                             |                   |                    |                    |                    |
| 65-69                                   | 1.0 (reference)   | 1.0 (reference)    | 1.0 (reference)    | 1.0 (reference)    |
| 70-74                                   | 2.64 (2.23-3.12)  | 2.67 (2.25-3.16)   | 2.65 (2.22-3.16)   | 2.71 (2.26-3.25)   |
| 75-79                                   | 5.42 (4.60-6.38)  | 5.59 (4.73-6.61)   | 5.84 (4.93-6.93)   | 5.97 (5.00-7.13)   |
| 80-84                                   | 9.85 (8.24-11.78) | 10.08 (8.40-12.10) | 10.30 (8.53-12.43) | 10.31 (8.46-12.56) |

|                          |                     |                     |                     |                     |
|--------------------------|---------------------|---------------------|---------------------|---------------------|
| 85+                      | 19.01 (15.38-23.50) | 19.32 (15.52-24.06) | 19.32 (15.33-24.34) | 18.64 (14.52-23.92) |
| Living alone             |                     |                     |                     |                     |
| No                       | 1.0 (reference)     | 1.0 (reference)     | 1.0 (reference)     | 1.0 (reference)     |
| Yes                      | 0.94 (0.80-1.11)    | 0.94 (0.79-1.12)    | 0.98 (0.82-1.17)    | 1.03 (0.86-1.24)    |
| Marital status           |                     |                     |                     |                     |
| Married                  | 1.0 (reference)     | 1.0 (reference)     | 1.0 (reference)     | 1.0 (reference)     |
| Widowed or divorced      | 1.09 (0.96-1.24)    | 1.09 (0.96-1.24)    | 1.06 (0.92-1.21)    | 1.00 (0.86-1.15)    |
| Never married            | 1.28 (0.92-1.78)    | 1.22 (0.87-1.73)    | 1.24 (0.87-1.76)    | 1.25 (0.87-1.79)    |
| Other/Missing            | 1.12 (0.80-1.56)    | 1.13 (0.80-1.58)    | 1.09 (0.77-1.56)    | 1.09 (0.76-1.57)    |
| Education (years)        |                     |                     |                     |                     |
| $\geq 13$                | 1.0 (reference)     | 1.0 (reference)     | 1.0 (reference)     | 1.0 (reference)     |
| 10-12                    | 0.89 (0.74-1.08)    | 0.89 (0.74-1.08)    | 0.89 (0.73-1.08)    | 0.92 (0.75-1.13)    |
| 6-9                      | 0.96 (0.80-1.15)    | 0.95 (0.79-1.14)    | 0.95 (0.79-1.15)    | 0.96 (0.79-1.16)    |
| <6                       | 1.29 (1.02-1.63)    | 1.24 (0.97-1.57)    | 1.22 (0.95-1.57)    | 1.23 (0.95-1.61)    |
| Other/Missing            | 0.89 (0.57-1.40)    | 0.82 (0.51-1.33)    | 0.80 (0.48-1.33)    | 0.86 (0.51-1.45)    |
| Present illness          |                     |                     |                     |                     |
| No                       | 1.0 (reference)     | 1.0 (reference)     | 1.0 (reference)     | 1.0 (reference)     |
| Yes                      | 1.15 (1.02-1.30)    | 1.13 (1.00-1.28)    | 1.13 (1.00-1.28)    | 1.10 (0.96-1.26)    |
| Missing                  | 0.96 (0.75-1.24)    | 0.98 (0.75-1.27)    | 0.99 (0.75-1.29)    | 1.01 (0.76-1.33)    |
| GDS-15                   |                     |                     |                     |                     |
| 0-4                      | 1.0 (reference)     | 1.0 (reference)     | 1.0 (reference)     | 1.0 (reference)     |
| 5-9                      | 1.54 (1.37-1.73)    | 1.54 (1.37-1.74)    | 1.48 (1.31-1.68)    | 1.49 (1.30-1.69)    |
| 10-15                    | 2.33 (1.96-2.77)    | 2.18 (1.82-2.62)    | 2.16 (1.79-2.62)    | 2.17 (1.78-2.66)    |
| Missing                  | 1.47 (1.28-1.68)    | 1.43 (1.25-1.64)    | 1.41 (1.22-1.63)    | 1.41 (1.22-1.64)    |
| Smoking status           |                     |                     |                     |                     |
| Never                    | 1.0 (reference)     | 1.0 (reference)     | 1.0 (reference)     | 1.0 (reference)     |
| Former                   | 0.99 (0.85-1.16)    | 1.00 (0.86-1.18)    | 0.99 (0.84-1.17)    | 1.02 (0.86-1.21)    |
| Current                  | 1.34 (1.12-1.60)    | 1.32 (1.10-1.59)    | 1.39 (1.15-1.68)    | 1.40 (1.15-1.71)    |
| Missing                  | 0.86 (0.65-1.15)    | 0.90 (0.67-1.20)    | 0.85 (0.63-1.15)    | 0.91 (0.67-1.24)    |
| Alcohol consumption      |                     |                     |                     |                     |
| Non                      | 1.0 (reference)     | 1.0 (reference)     | 1.0 (reference)     | 1.0 (reference)     |
| Does not drink every_day | 0.96 (0.82-1.13)    | 0.96 (0.81-1.13)    | 0.97 (0.82-1.15)    | 0.96 (0.80-1.15)    |

|                                     |                      |                      |                      |                  |
|-------------------------------------|----------------------|----------------------|----------------------|------------------|
| Drinks every_day $\leq$<br>35 g/day | 0.98 (0.84-<br>1.15) | 0.99 (0.84-<br>1.16) | 1.02 (0.86-<br>1.20) | 1.03 (0.87-1.22) |
| Drinks every_day $>$<br>35 g/day    | 0.86 (0.64-<br>1.17) | 0.90 (0.66-<br>1.21) | 0.92 (0.68-<br>1.26) | 0.91 (0.66-1.26) |
| Missing                             | 1.14 (0.78-<br>1.66) | 1.14 (0.78-<br>1.67) | 1.24 (0.84-<br>1.83) | 1.22 (0.82-1.83) |
| <i>Random effects</i>               |                      |                      |                      |                  |
| Community level variance<br>(SE)    | 0.06 (0.05)          | 0.04 (0.06)          | 0.04 (0.07)          | 0.09 (0.04)      |

\*HR for one point increment of community social support (range: 0-100)
